# Supplementary material for: Theoretical comparison of fructose with methylglucoside for the production of formate and levulinate catalyzed by Brønsted acids in a methanol solution
Source: Royal Society of Chemistry journal article supplement (doi:10.1039/d4cp01455c), 2024-01-01
Supplement: d4cp01455c2.pdf [file d4cp01455c2.pdf]

## Supporting Information

### Theoretical Comparison of Removing Formate from Fructose with Methylglucoside into Levulinate Catalyzed by Brønsted Acid in Methanol Solution

Jin-Shan Xiong<sup>a</sup>, Han-Yun Min<sup>a</sup>, Ting Qi<sup>a</sup>, Yin-Sheng Zhang<sup>a</sup>, Chang-Wei Hu<sup>b</sup>, Hua-Qing Yang<sup>a\*</sup>

<sup>a</sup>College of Chemical Engineering, Sichuan University, Chengdu, Sichuan, 610065, P.R. China

<sup>b</sup>Key Laboratory of Green Chemistry and Technology, Ministry of Education, College of Chemistry, Sichuan University, Chengdu, Sichuan, 610064, P.R. China

\*Correspondence to:

H.-Q. Yang; e-mail: [huaqingyang@scu.edu.cn](mailto:huaqingyang@scu.edu.cn);

Fax: 86 28 85464466;

Telephone: 86 28 85464466

---

## Catalogue

- (1). **Figure S1.** The geometric structures and the relative Gibbs free energy ( $\Delta G$ ,  $\text{kJ mol}^{-1}$ ) relative to  $\beta$ -D-fructofuranoses for five configurations of fructose at PBE0/6-311++G(d,p) level in methanol solution under ambient temperature and pressure (453.15 K and 25 atm). For clarity, hydrogen atoms on carbon are not shown. Bond lengths are reported in Å. ....1
- (2). **Figure S2.** The geometric structures and the relative Gibbs free energy ( $\Delta G$ ,  $\text{kJ mol}^{-1}$ ) relative to HMF-1 for five tautomers of HMF at PBE0/6-311++G(d,p) level in methanol solution under ambient temperature and pressure (453.15 K and 25 atm). For clarity, hydrogen atoms on carbon are not shown. Bond lengths are reported in Å. ....2
- (3). **Figure S3.** The geometric structures (a) and the schematic energy diagrams (b) with the relative Gibbs free energy ( $G_r$ ,  $\text{kJ mol}^{-1}$ ) relative to the reactants for the dehydration of fructose to HMF in the absence of catalyst. For clarity, hydrogen atoms on carbon are not shown. Bond lengths are reported in Å. ....3
- (4). **Figure S4.** The geometric structures (a) and the schematic energy diagrams (b) with the relative Gibbs free energy ( $G_r$ ,  $\text{kJ mol}^{-1}$ ) relative to the reactants for the dehydration of fructose to HMF in the presence of explicit  $\text{CH}_3\text{OH}$  in methanol solution. For clarity, hydrogen atoms on carbon are not shown. Bond lengths are reported in Å. ....4
- (5). **Figure S5.** The geometric structures (a) and the schematic energy diagrams (b) with the relative Gibbs free energy ( $G_r$ ,  $\text{kJ mol}^{-1}$ ) relative to the reactants for the dehydration of fructose to HMF catalyzed by  $[\text{CH}_3\text{OH}_2]^+$ . For clarity, hydrogen atoms on carbon are not shown. Bond lengths are reported in Å. ....5
- (6). **Figure S6.** The geometric structures (a) and the schematic energy diagrams (b) with the relative Gibbs free energy ( $G_r$ ,  $\text{kJ mol}^{-1}$ ) relative to the reactants for the first and second conversion pathway of HMF with methanol to MF and MLev in the absence of catalyst. For clarity, hydrogen atoms on carbon are not shown. Bond lengths are reported in Å. ....6
- (7). **Figure S7.** The geometric structures (a) and the schematic energy diagrams (b) with the relative Gibbs free energy ( $G_r$ ,  $\text{kJ mol}^{-1}$ ) relative to the reactants for the third conversion pathway of HMF with methanol to MF and MLev in the absence of catalyst. For clarity, hydrogen atoms on carbon are not shown. Bond lengths are reported in Å. ....7
- (8). **Figure S8.** The geometric structures (a) and the schematic energy diagrams (b) with the relative Gibbs free energy ( $G_r$ ,  $\text{kJ mol}^{-1}$ ) relative to the reactants for the fourth conversion pathway of HMF with methanol to MF and MLev in the absence of catalyst. For clarity, hydrogen atoms on carbon are not shown. Bond lengths are reported in Å. ....8
- (9). **Figure S9.** The geometric structures (a) and the schematic energy diagrams (b) with the relative Gibbs free energy ( $G_r$ ,  $\text{kJ mol}^{-1}$ ) relative to the reactants for the conversion of HMF through protonation of the carbonyl oxygen with  $\text{CH}_3\text{OH}$  to both MLev and MF catalyzed by  $[\text{CH}_3\text{OH}_2]^+$  in methanol solution. For clarity, hydrogen atoms on carbon are not shown. Bond lengths are reported in Å. ....9
- (10). **Figure S10.** The radial distribution functions (RDF) of solvent molecules with respect to six-type oxygen of methyl glucoside, i.e., (a) the  $-\text{O1CH}_3$  group, (b) the  $-\text{O2H}$  group, (c) the  $-\text{O3H}$  group, (d) the  $-\text{O4H}$  group, (e) the  $-\text{O5}$  group, (f) the  $-\text{O6H}$  group, (g) the center of MG mass. ....10

- 
- (11). **Figure S11.** The geometric structures (a) and the schematic energy diagrams (b) with the relative Gibbs free energy ( $G_r$ , kJ mol<sup>-1</sup>) relative to the reactants for the dehydration of MG through –O2H group with methanol to MF and MLev in the absence of catalyst. For clarity, hydrogen atoms on carbon are not shown. Bond lengths are reported in Å. ....11
- (12). **Figure S12.** The geometric structures (a) and the schematic energy diagrams (b) with the relative Gibbs free energy ( $G_r$ , kJ mol<sup>-1</sup>) relative to the reactants for the dehydration of MG through –O3H group with methanol to MF and MLev in the absence of catalyst. For clarity, hydrogen atoms on carbon are not shown. Bond lengths are reported in Å. ....12
- (13). **Figure S13.** The geometric structures (a) and the schematic energy diagrams (b) with the relative Gibbs free energy ( $G_r$ , kJ mol<sup>-1</sup>) relative to the reactants for the dehydration of MG through –O4H group with methanol to MF and MLev in the absence of catalyst. For clarity, hydrogen atoms on carbon are not shown. Bond lengths are reported in Å. ....13
- (14). **Figure S14.** Arrhenius plots of rate constants for the crucial reaction step for **P-i+ii** of fructose to MLev and MF through HMF in the presence of [CH<sub>3</sub>OH<sub>2</sub>]<sup>+</sup> in methanol solution. ....16
- (15). **Figure S15.** Arrhenius plots of rate constants for the crucial reaction step for **P-iii-2** of MG with methanol to MLev and MF through –O2H protonated in the presence of [CH<sub>3</sub>OH<sub>2</sub>]<sup>+</sup> in methanol solution. ....17
- (16). **Figure S16.** Arrhenius plots of rate constants for the crucial reaction step for **P-iii-3** of MG with methanol to MLev and MF through –O3H protonated in the presence of [CH<sub>3</sub>OH<sub>2</sub>]<sup>+</sup> in methanol solution. ....18
- (17). **Figure S17.** Arrhenius plots of rate constants for the crucial reaction step for **P-iii-4** of MG with methanol to MLev and MF through –O4H protonated in the presence of [CH<sub>3</sub>OH<sub>2</sub>]<sup>+</sup> in methanol solution. ....19
- (18). **Table S1.** The proportion of rate constants ( $k_{P-iii-2}$ ,  $k_{P-iii-3}$  and  $k_{P-iii-4}$ ) for the dehydration of MG with methanol to MF and MLev catalyzed by [CH<sub>3</sub>OH]<sub>4</sub><sup>+</sup> under the temperature range of 403 – 503 K. ....20
- (19). **Table S2.** The proportion of rate constants  $k_{P-iii-2}$ ,  $k_{P-iii-4}$  and  $k_{P-i+ii}$  under the temperature range of 403 – 503 K. ....21
- (20). **Table S3.** Zero-point energies ( $ZPE$ , hartree), thermal correction to Gibbs free energy ( $G_0$ , hartree), total energies ( $E_c$ , hartree) corrected by  $ZPE$ , sum of electronic and thermal free energies ( $G_c$ , hartree) with  $ZPE$  and thermal corrections, and relative energies ( $E_r$ , kJ mol<sup>-1</sup>) and relative Gibbs free energies ( $G_r$ , kJ mol<sup>-1</sup>) relative to β-D-fructofuranoses for five configurations of fructose at PBE0/6-311++G(d,p) level in methanol solution. ....22
- (21). **Table S4.** Zero-point energies ( $ZPE$ , hartree), thermal correction to Gibbs free energy ( $G_0$ , hartree), total energies ( $E_c$ , hartree) corrected by  $ZPE$ , sum of electronic and thermal free energies ( $G_c$ , hartree) with  $ZPE$  and thermal corrections, and relative energies ( $E_r$ , kJ mol<sup>-1</sup>) and relative Gibbs free energies ( $G_r$ , kJ mol<sup>-1</sup>) relative to HMF-1 for eight tautomers of 5-hydroxymethylfurfural at PBE0/6-311++G(d,p) level in methanol solution. ....23
- (22). **Table S5.** Zero-point energies ( $ZPE$ , hartree), thermal correction to Gibbs free energy ( $G_0$ , hartree), total energies ( $E_c$ , hartree) corrected by  $ZPE$ , sum of electronic and thermal free energies ( $G_c$ , hartree) with  $ZPE$  and thermal corrections, and relative energies ( $E_r$ , kJ mol<sup>-1</sup>)

---

and relative Gibbs free energies ( $G_r$ , kJ mol<sup>-1</sup>) for the dehydration of fructose to HMF-1 in the absence of catalyst at PBE0/6-311++G (d, p) level in methanol solution.....24

(23). **Table S6.** Zero-point energies ( $ZPE$ , hartree), thermal correction to Gibbs free energy ( $G_0$ , hartree), total energies ( $E_c$ , hartree) corrected by  $ZPE$ , sum of electronic and thermal free energies ( $G_c$ , hartree) with  $ZPE$  and thermal corrections, and relative energies ( $E_r$ , kJ mol<sup>-1</sup>) and relative Gibbs free energies ( $G_r$ , kJ mol<sup>-1</sup>) for the dehydration of fructose to HMF-1 in the presence of explicit CH<sub>3</sub>OH at PBE0/6-311++G (d, p) level in methanol solution. ....25

(24). **Table S7.** Zero-point energies ( $ZPE$ , hartree), thermal correction to Gibbs free energy ( $G_0$ , hartree), total energies ( $E_c$ , hartree) corrected by  $ZPE$ , sum of electronic and thermal free energies ( $G_c$ , hartree) with  $ZPE$  and thermal corrections, and relative energies ( $E_r$ , kJ mol<sup>-1</sup>) and relative Gibbs free energies ( $G_r$ , kJ mol<sup>-1</sup>) for the dehydration of fructose to HMF-1 catalyzed by [CH<sub>3</sub>OH<sub>2</sub>]<sup>+</sup> at PBE0/6-311++G (d, p) level in methanol solution.....26

(25). **Table S8.** Zero-point energies ( $ZPE$ , hartree), thermal correction to Gibbs free energy ( $G_0$ , hartree), total energies ( $E_c$ , hartree) corrected by  $ZPE$ , sum of electronic and thermal free energies ( $G_c$ , hartree) with  $ZPE$  and thermal corrections, and relative energies ( $E_r$ , kJ mol<sup>-1</sup>) and relative Gibbs free energies ( $G_r$ , kJ mol<sup>-1</sup>) for the first and second conversion of HMF-1 with methanol to MF and MLev in the presence of CH<sub>3</sub>OH at PBE0/6-311++G (d, p) level in methanol solution. ....27

(26). **Table S9.** Zero-point energies ( $ZPE$ , hartree), thermal correction to Gibbs free energy ( $G_0$ , hartree), total energies ( $E_c$ , hartree) corrected by  $ZPE$ , sum of electronic and thermal free energies ( $G_c$ , hartree) with  $ZPE$  and thermal corrections, and relative energies ( $E_r$ , kJ mol<sup>-1</sup>) and relative Gibbs free energies ( $G_r$ , kJ mol<sup>-1</sup>) for the third conversion of HMF-1 with methanol to MF and MLev in the presence of CH<sub>3</sub>OH at PBE0/6-311++G (d, p) level in methanol solution. ....29

(27). **Table S10.** Zero-point energies ( $ZPE$ , hartree), thermal correction to Gibbs free energy ( $G_0$ , hartree), total energies ( $E_c$ , hartree) corrected by  $ZPE$ , sum of electronic and thermal free energies ( $G_c$ , hartree) with  $ZPE$  and thermal corrections, and relative energies ( $E_r$ , kJ mol<sup>-1</sup>) and relative Gibbs free energies ( $G_r$ , kJ mol<sup>-1</sup>) for the fourth conversion of HMF-1 with methanol to MF and MLev in the presence of CH<sub>3</sub>OH at PBE0/6-311++G (d, p) level in methanol solution. ....30

(28). **Table S11.** Zero-point energies ( $ZPE$ , hartree), thermal correction to Gibbs free energy ( $G_0$ , hartree), total energies ( $E_c$ , hartree) corrected by  $ZPE$ , sum of electronic and thermal free energies ( $G_c$ , hartree) with  $ZPE$  and thermal corrections, and relative energies ( $E_r$ , kJ mol<sup>-1</sup>) and relative Gibbs free energies ( $G_r$ , kJ mol<sup>-1</sup>) for the dehydration of HMF-1 with methanol to MF and MLev catalyzed by [CH<sub>3</sub>OH<sub>2</sub>]<sup>+</sup> at PBE0/6-311++G (d, p) level in methanol solution. ....31

(29). **Table S12.** Zero-point energies ( $ZPE$ , hartree), thermal correction to Gibbs free energy ( $G_0$ , hartree), total energies ( $E_c$ , hartree) corrected by  $ZPE$ , sum of electronic and thermal free energies ( $G_c$ , hartree) with  $ZPE$  and thermal corrections, and relative energies ( $E_r$ , kJ mol<sup>-1</sup>) and relative Gibbs free energies ( $G_r$ , kJ mol<sup>-1</sup>) for the dehydration of MG through -O2H group with methanol to MF and MLev in the absence of catalyst in methanol solution. ....33

(30). **Table S13.** Zero-point energies ( $ZPE$ , hartree), thermal correction to Gibbs free energy ( $G_0$ , hartree), total energies ( $E_c$ , hartree) corrected by  $ZPE$ , sum of electronic and thermal free

- 
- energies ( $G_c$ , hartree) with *ZPE* and thermal corrections, and relative energies ( $E_r$ , kJ mol<sup>-1</sup>) and relative Gibbs free energies ( $G_r$ , kJ mol<sup>-1</sup>) for the dehydration of MG through –O3H group with methanol to MF and MLev in the absence of catalyst in methanol solution. ....35
- (31). **Table S14.** Zero-point energies (*ZPE*, hartree), thermal correction to Gibbs free energy ( $G_0$ , hartree), total energies ( $E_c$ , hartree) corrected by *ZPE*, sum of electronic and thermal free energies ( $G_c$ , hartree) with *ZPE* and thermal corrections, and relative energies ( $E_r$ , kJ mol<sup>-1</sup>) and relative Gibbs free energies ( $G_r$ , kJ mol<sup>-1</sup>) for the dehydration of MG through –O4H group with methanol to MF and MLev in the absence of catalyst in methanol solution. ....36
- (32). **Table S15.** Zero-point energies (*ZPE*, hartree), thermal correction to Gibbs free energy ( $G_0$ , hartree), total energies ( $E_c$ , hartree) corrected by *ZPE*, sum of electronic and thermal free energies ( $G_c$ , hartree) with *ZPE* and thermal corrections, and relative energies ( $E_r$ , kJ mol<sup>-1</sup>) and relative Gibbs free energies ( $G_r$ , kJ mol<sup>-1</sup>) for the dehydration of MG through –O2H protonated with methanol to MF and MLev catalyzed by [CH<sub>3</sub>OH<sub>2</sub>]<sup>+</sup> in methanol solution. 37
- (33). **Table S16.** Zero-point energies (*ZPE*, hartree), thermal correction to Gibbs free energy ( $G_0$ , hartree), total energies ( $E_c$ , hartree) corrected by *ZPE*, sum of electronic and thermal free energies ( $G_c$ , hartree) with *ZPE* and thermal corrections, and relative energies ( $E_r$ , kJ mol<sup>-1</sup>) and relative Gibbs free energies ( $G_r$ , kJ mol<sup>-1</sup>) for the dehydration of MG through –O3H protonated with methanol to MF and MLev catalyzed by [CH<sub>3</sub>OH<sub>2</sub>]<sup>+</sup> in methanol solution. 39
- (34). **Table S17.** Zero-point energies (*ZPE*, hartree), thermal correction to Gibbs free energy ( $G_0$ , hartree), total energies ( $E_c$ , hartree) corrected by *ZPE*, sum of electronic and thermal free energies ( $G_c$ , hartree) with *ZPE* and thermal corrections, and relative energies ( $E_r$ , kJ mol<sup>-1</sup>) and relative Gibbs free energies ( $G_r$ , kJ mol<sup>-1</sup>) for the dehydration of MG through –O4H protonated with methanol to MF and MLev catalyzed by [CH<sub>3</sub>OH<sub>2</sub>]<sup>+</sup> in methanol solution. 40
- (35). **Table S18.** Zero-point energies (*ZPE*, hartree), thermal correction to Gibbs free energy ( $G_0$ , hartree), total energies ( $E_c$ , hartree) corrected by *ZPE*, sum of electronic and thermal free energies ( $G_c$ , hartree) with *ZPE* and thermal corrections, and relative energies ( $E_r$ , kJ mol<sup>-1</sup>) and relative Gibbs free energies ( $G_r$ , kJ mol<sup>-1</sup>) for the conversion of HMF through protonation of the carbonyl oxygen with CH<sub>3</sub>OH to both MLev and MF catalyzed by [CH<sub>3</sub>OH<sub>2</sub>]<sup>+</sup> in methanol solution. ....42

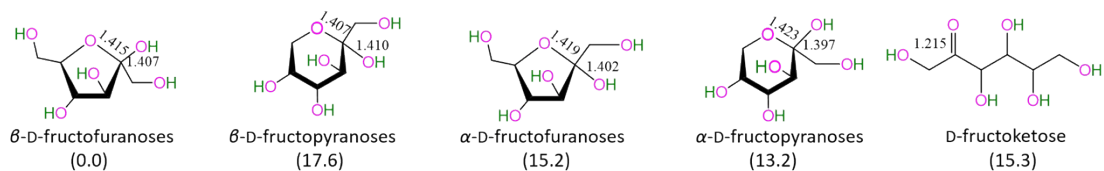

**Figure S1.** The geometric structures and the relative Gibbs free energy ( $\Delta G$ ,  $\text{kJ mol}^{-1}$ ) relative to  $\beta$ -D-fructofuranoses for five configurations of fructose at PBE0/6-311++G(d,p) level in methanol solution under ambient temperature and pressure (453.15 K and 25 atm). For clarity, hydrogen atoms on carbon are not shown. Bond lengths are reported in Å.

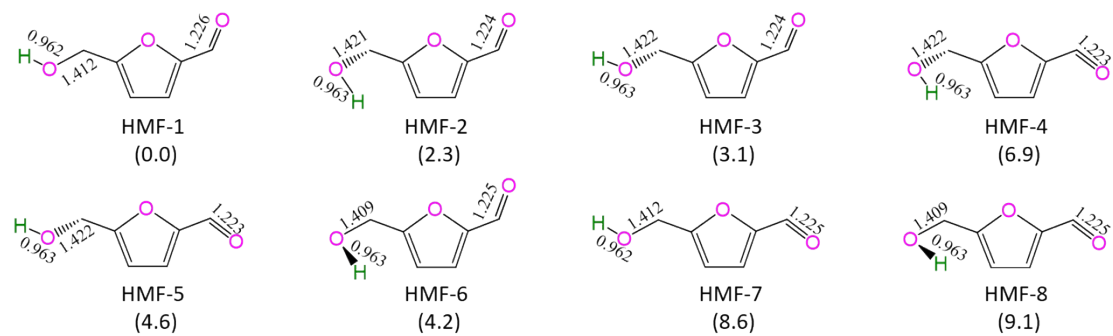

**Figure S2.** The geometric structures and the relative Gibbs free energy ( $\Delta G$ ,  $\text{kJ mol}^{-1}$ ) relative to HMF-1 for five tautomers of HMF at PBE0/6-311++G(d,p) level in methanol solution under ambient temperature and pressure (453.15 K and 25 atm). For clarity, hydrogen atoms on carbon are not shown. Bond lengths are reported in Å.

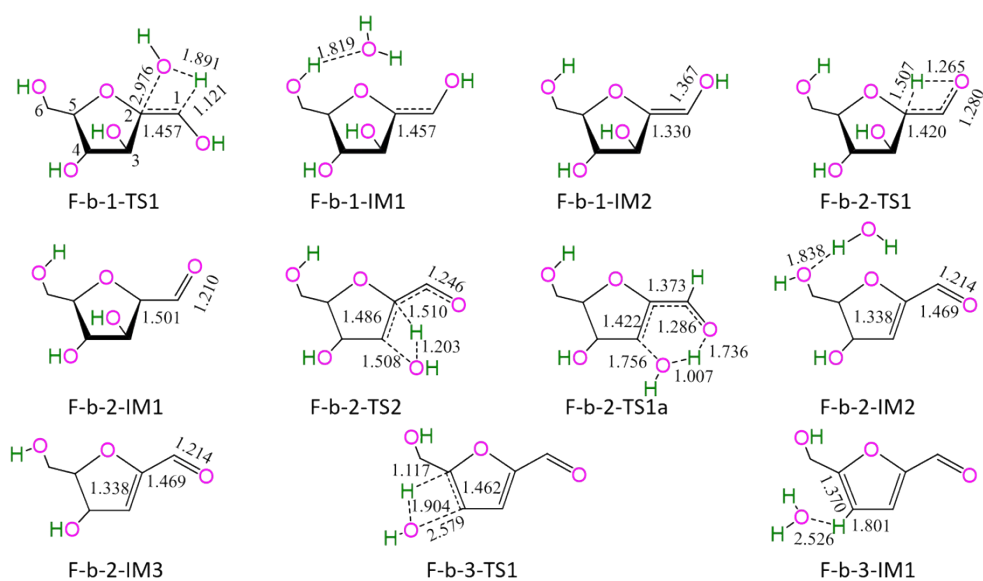

(a)

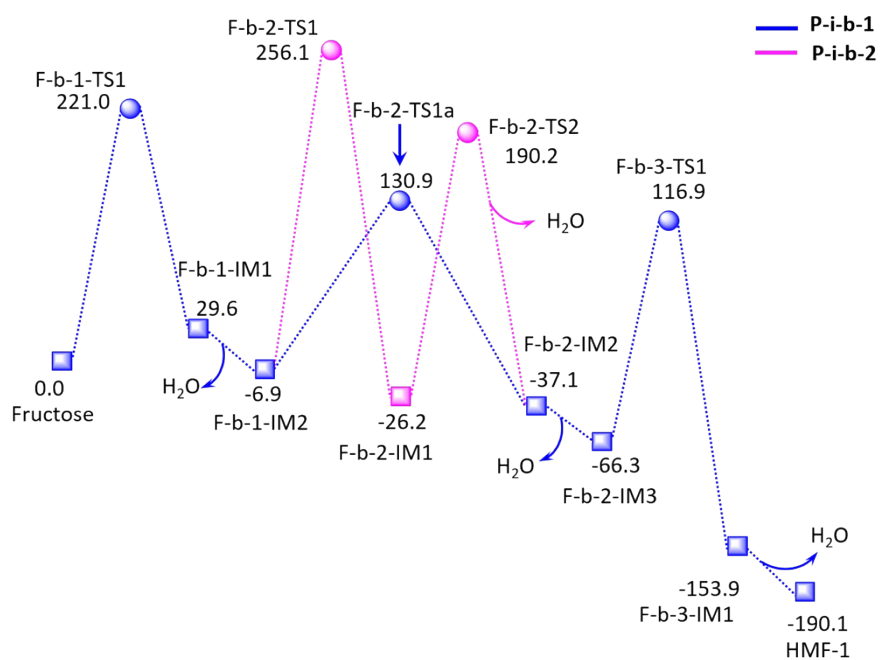

(b)

**Figure S3.** The geometric structures (a) and the schematic energy diagrams (b) with the relative Gibbs free energy ( $G_r$ ,  $\text{kJ mol}^{-1}$ ) relative to the reactants for the dehydration of fructose to HMF in the absence of catalyst. For clarity, hydrogen atoms on carbon are not shown. Bond lengths are reported in Å.



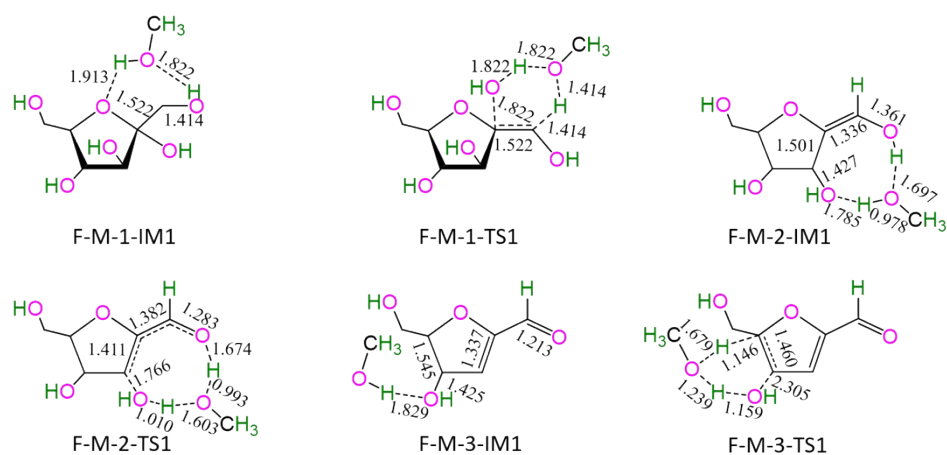

(a)

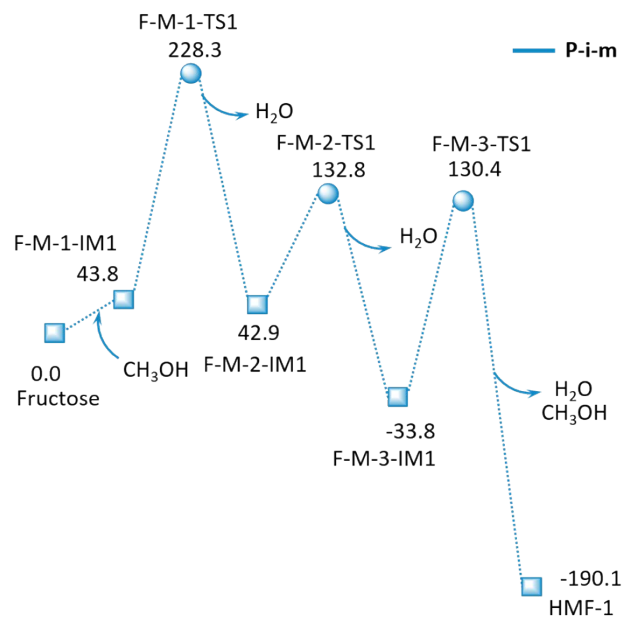

(b)

**Figure S4.** The geometric structures (a) and the schematic energy diagrams (b) with the relative Gibbs free energy ( $G_r$ , kJ mol<sup>-1</sup>) relative to the reactants for the dehydration of fructose to HMF in the presence of explicit CH<sub>3</sub>OH in methanol solution. For clarity, hydrogen atoms on carbon are not shown. Bond lengths are reported in Å.

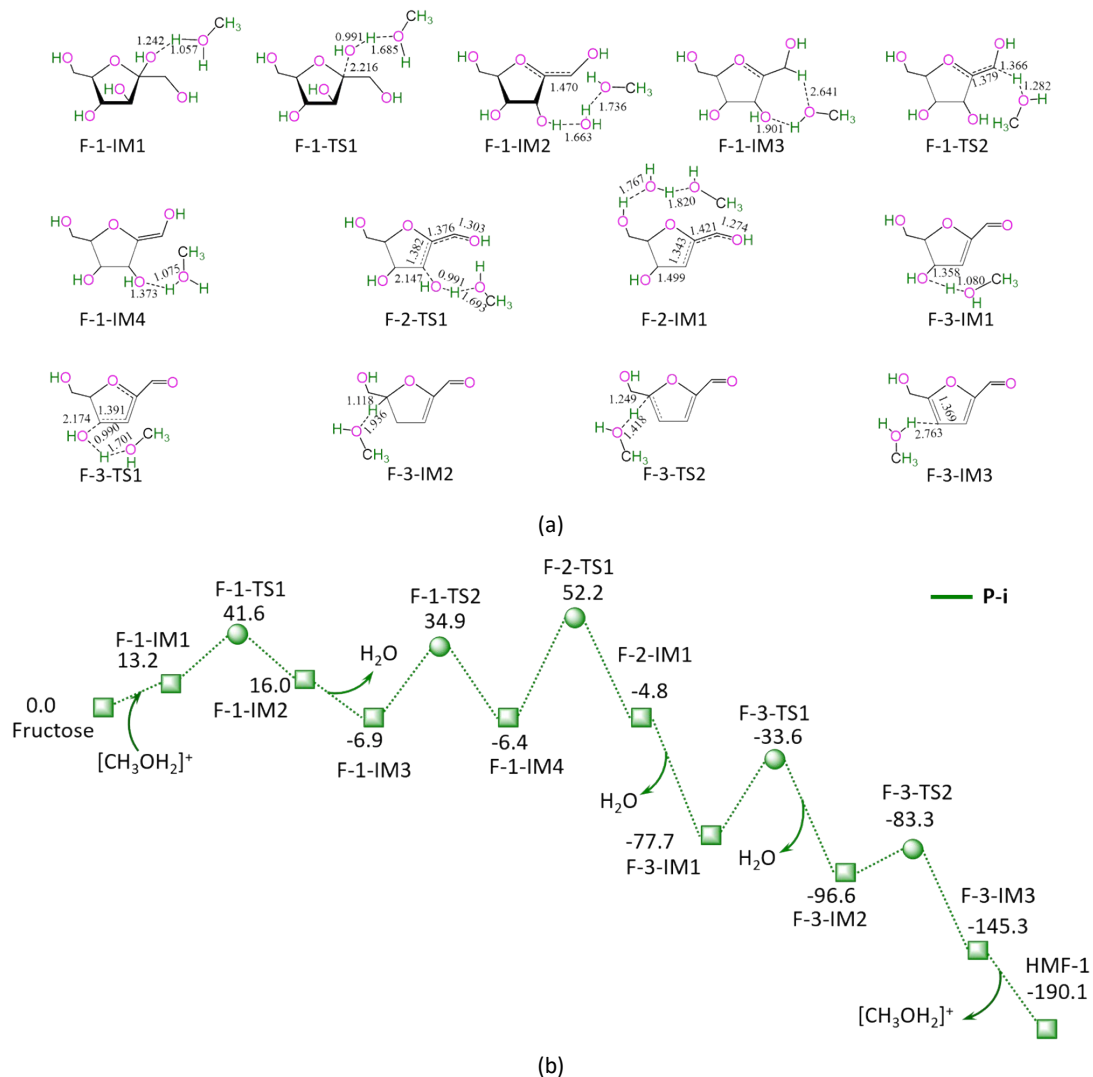

**Figure S5.** The geometric structures (a) and the schematic energy diagrams (b) with the relative Gibbs free energy ( $G_r$ ,  $\text{kJ mol}^{-1}$ ) relative to the reactants for the dehydration of fructose to HMF catalyzed by  $[\text{CH}_3\text{OH}_2]^+$ . For clarity, hydrogen atoms on carbon are not shown. Bond lengths are reported in Å.

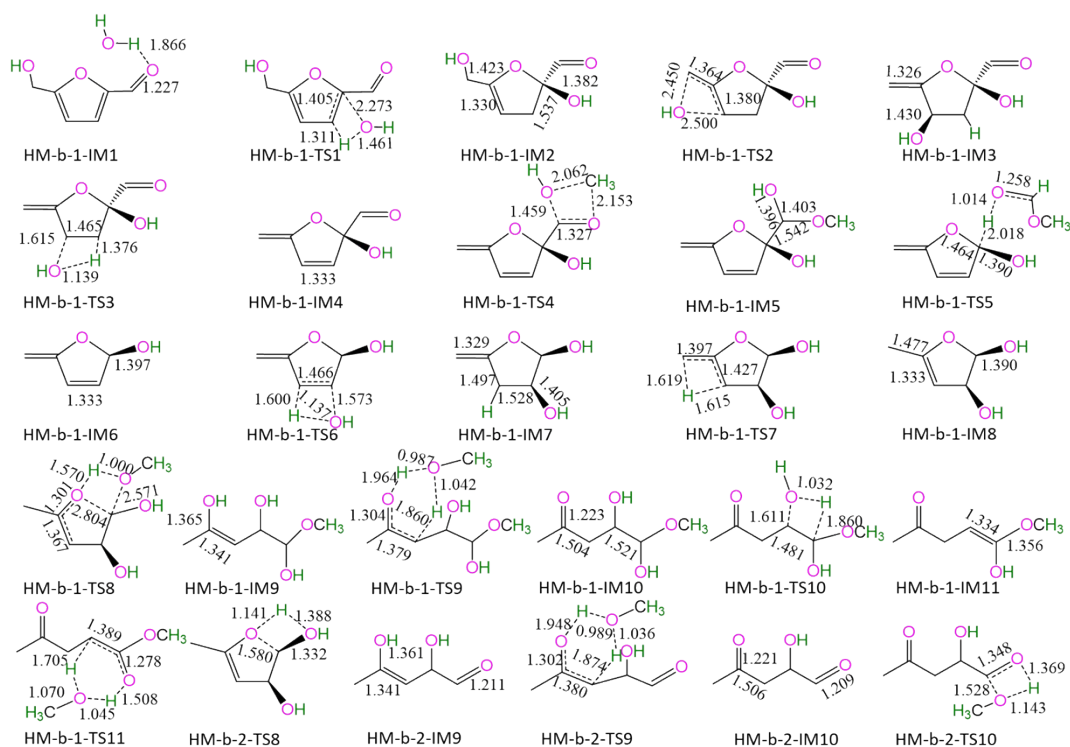

(a)

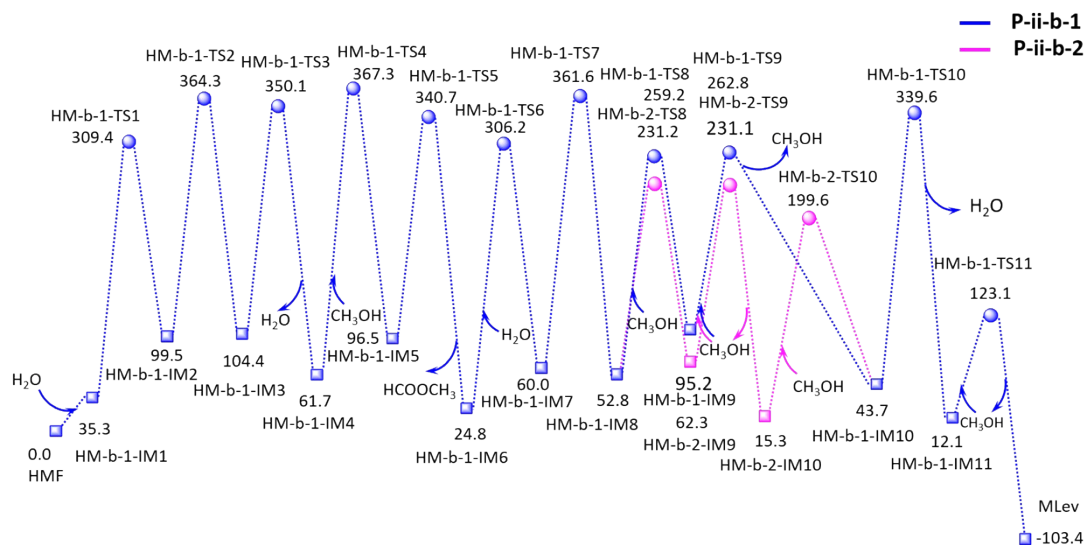

(b)

**Figure S6.** The geometric structures (a) and the schematic energy diagrams (b) with the relative Gibbs free energy ( $G_r$ ,  $\text{kJ mol}^{-1}$ ) relative to the reactants for the first and second conversion pathway of HMF with methanol to MF and MLev in the absence of catalyst. For clarity, hydrogen atoms on carbon are not shown. Bond lengths are reported in Å.

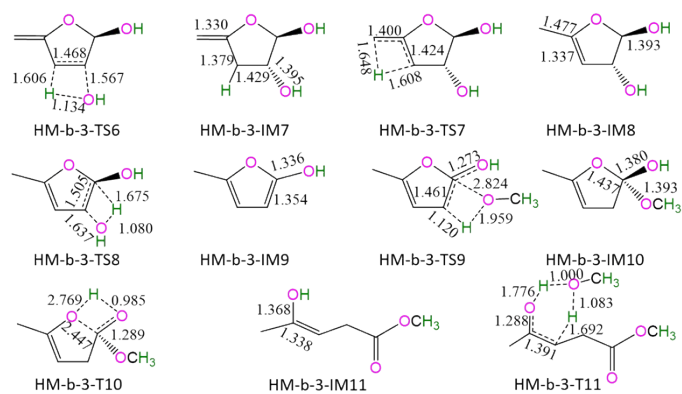

(a)

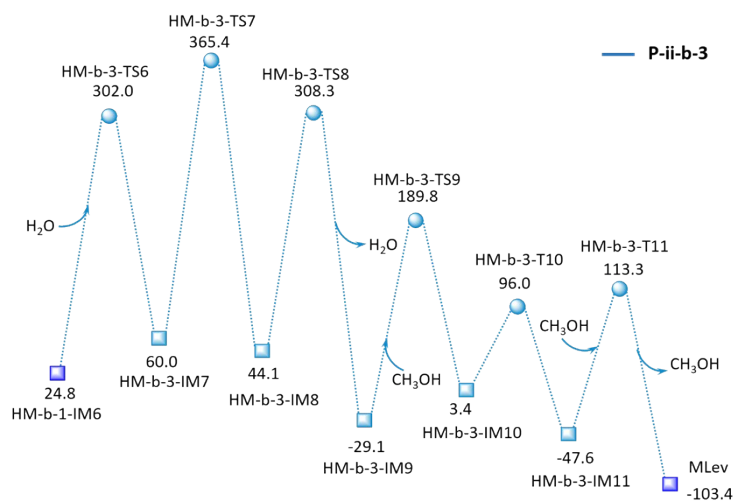

(b)

**Figure S7.** The geometric structures (a) and the schematic energy diagrams (b) with the relative Gibbs free energy ( $G_r$ ,  $\text{kJ mol}^{-1}$ ) relative to the reactants for the third conversion pathway of HMF with methanol to MF and MLev in the absence of catalyst. For clarity, hydrogen atoms on carbon are not shown. Bond lengths are reported in Å.

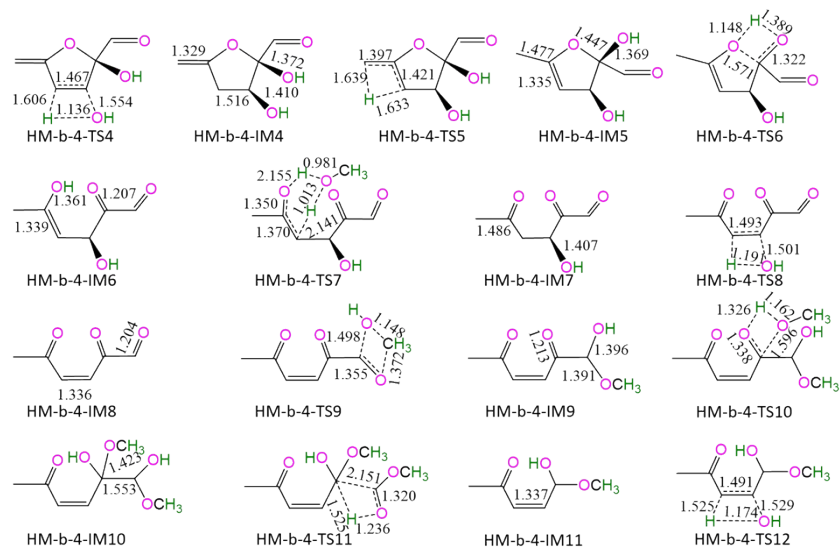

(a)

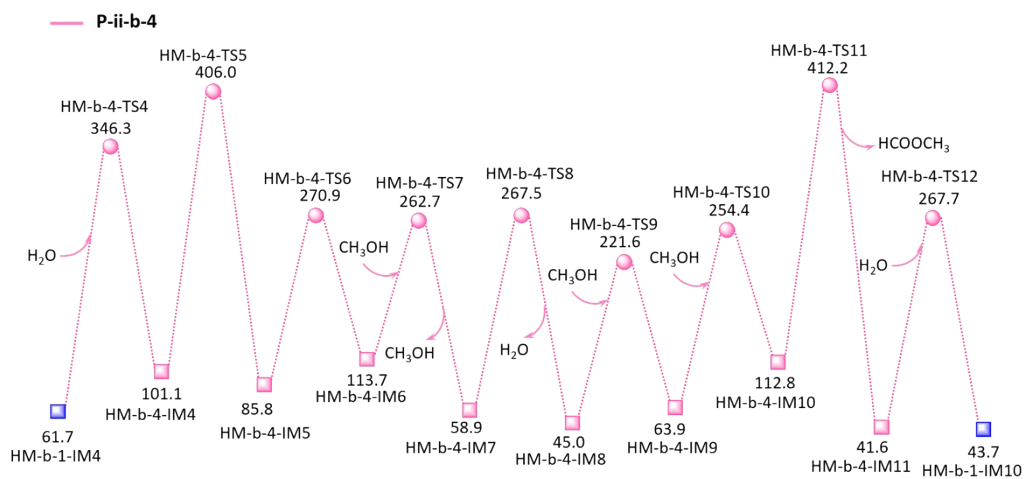

(b)

**Figure S8.** The geometric structures (a) and the schematic energy diagrams (b) with the relative Gibbs free energy ( $G_r$ , kJ mol<sup>-1</sup>) relative to the reactants for the fourth conversion pathway of HMF with methanol to MF and MLev in the absence of catalyst. For clarity, hydrogen atoms on carbon are not shown. Bond lengths are reported in Å.

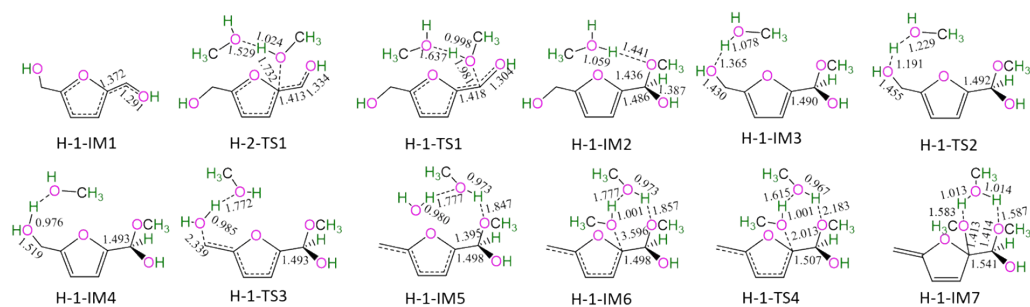

(a)

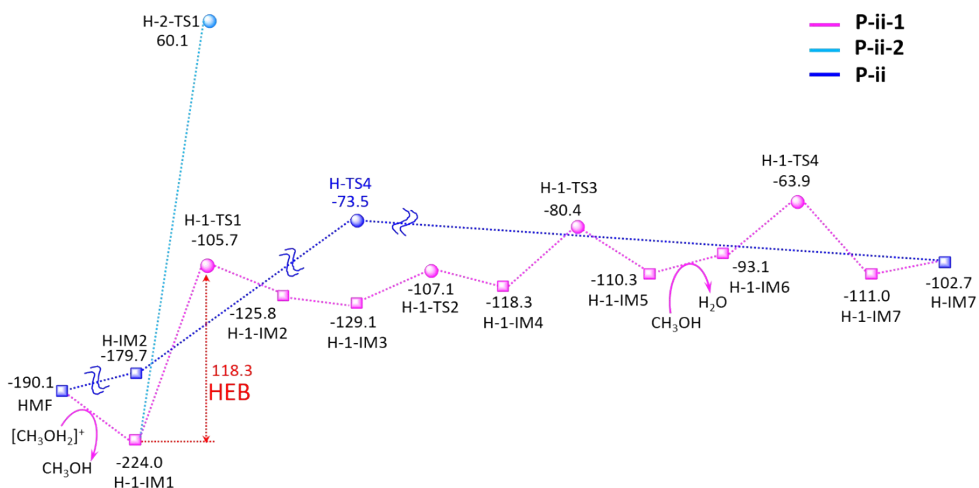

(b)

**Figure S9.** The geometric structures (a) and the schematic energy diagrams (b) with the relative Gibbs free energy ( $G_r$ , kJ mol<sup>-1</sup>) relative to the reactants for the conversion of HMF through protonation of the carbonyl oxygen with CH<sub>3</sub>OH to both MLev and MF catalyzed by [CH<sub>3</sub>OH<sub>2</sub>]<sup>+</sup> in methanol solution. For clarity, hydrogen atoms on carbon are not shown. Bond lengths are reported in Å.

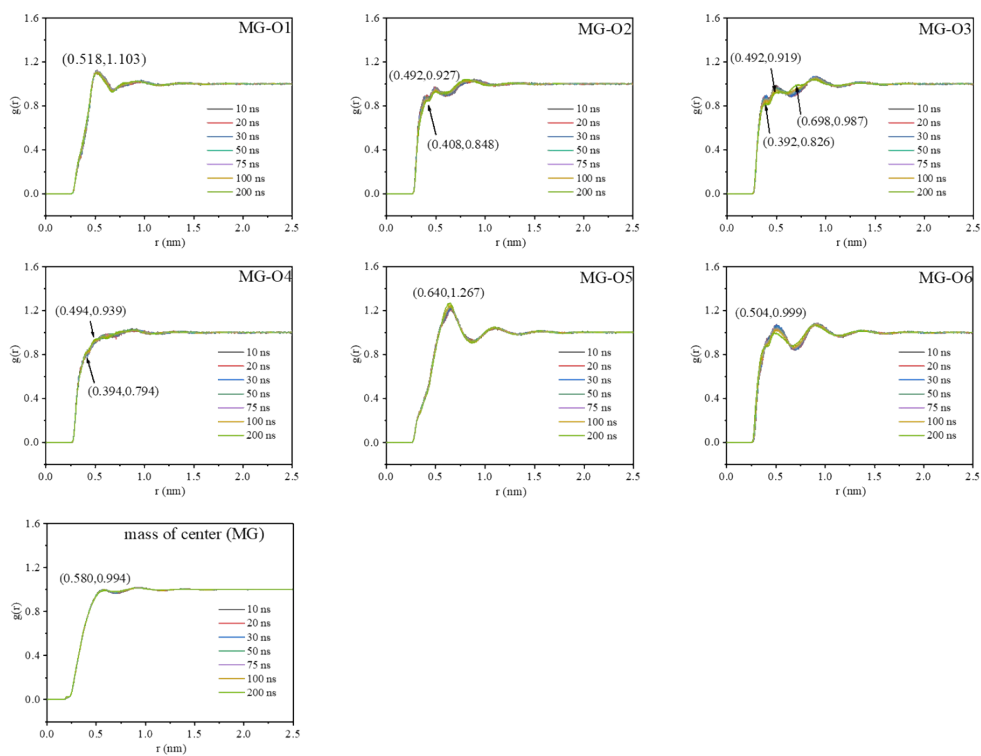

**Figure S10.** The radial distribution functions (RDF) of solvent molecules with respect to six-type oxygen of methyl glucoside, i.e., (a) the  $-O1CH_3$  group, (b) the  $-O2H$  group, (c) the  $-O3H$  group, (d) the  $-O4H$  group, (e) the  $-O5$  group, (f) the  $-O6H$  group, (g) the center of MG mass.

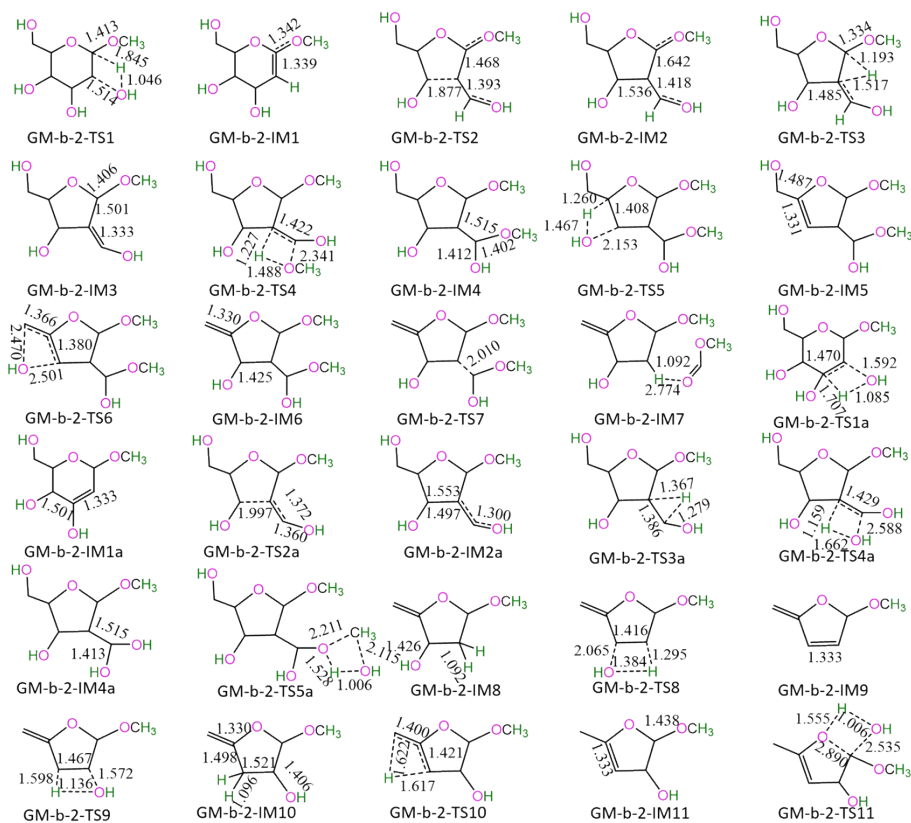

(a)

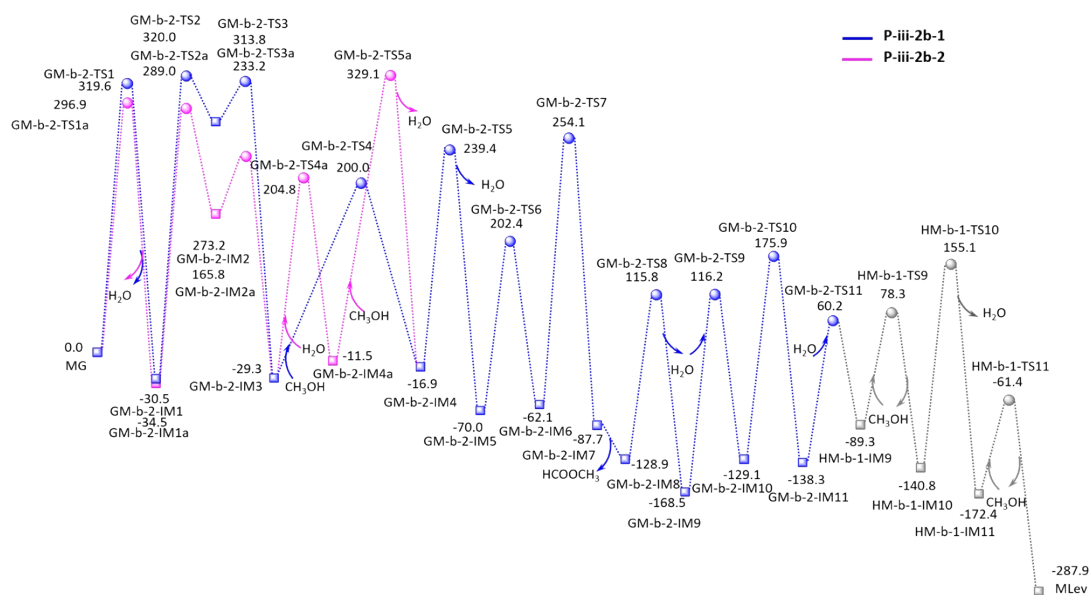

(b)

**Figure S11.** The geometric structures (a) and the schematic energy diagrams (b) with the relative Gibbs free energy ( $G_r$ ,  $\text{kJ mol}^{-1}$ ) relative to the reactants for the dehydration of MG through  $-O_2H$  group with methanol to MF and MLev in the absence of catalyst. For clarity, hydrogen atoms on carbon are not shown. Bond lengths are reported in Å.



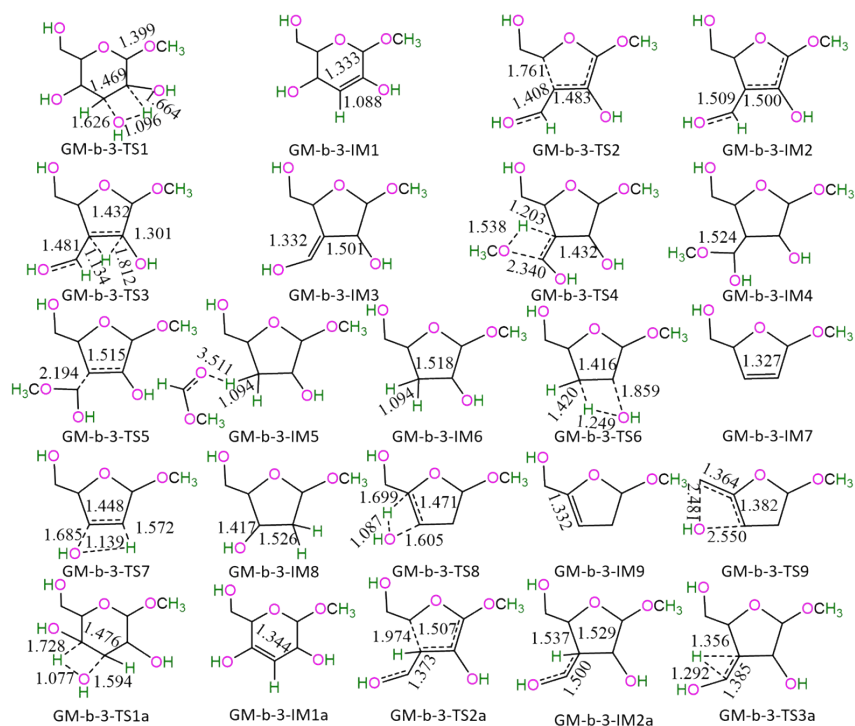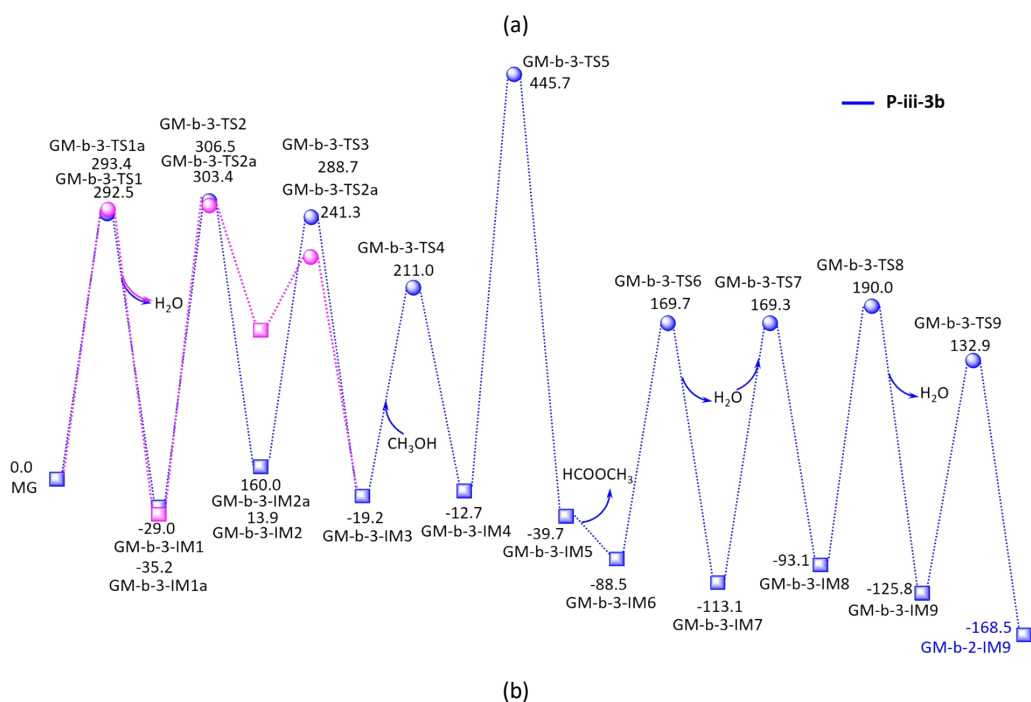

**Figure S12.** The geometric structures (a) and the schematic energy diagrams (b) with the relative Gibbs free energy (Gr, kJ mol<sup>-1</sup>) relative to the reactants for the dehydration of MG through -O3H group with methanol to MF and MLev in the absence of catalyst. For clarity, hydrogen atoms on carbon are not shown. Bond lengths are reported in Å.

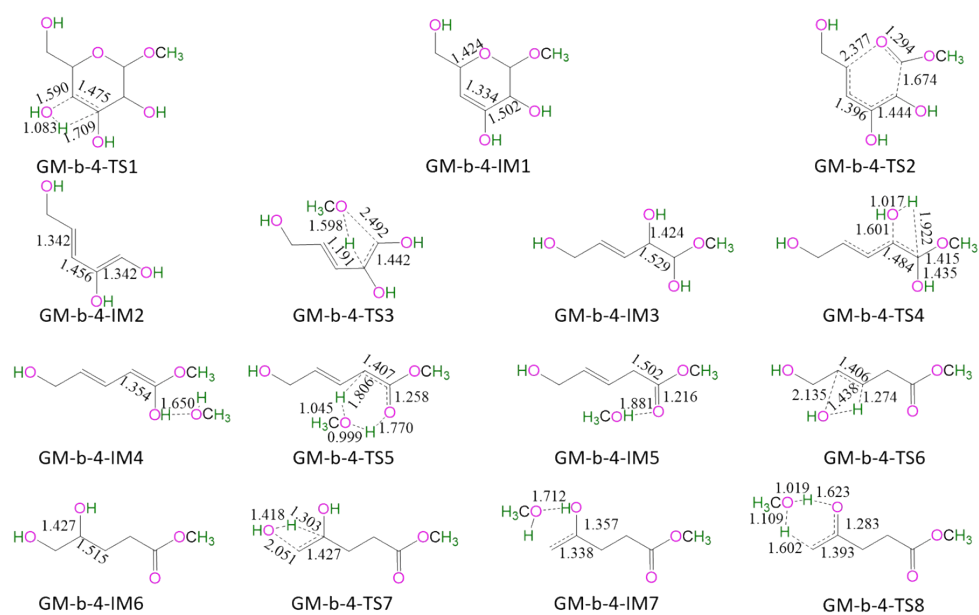

(a)

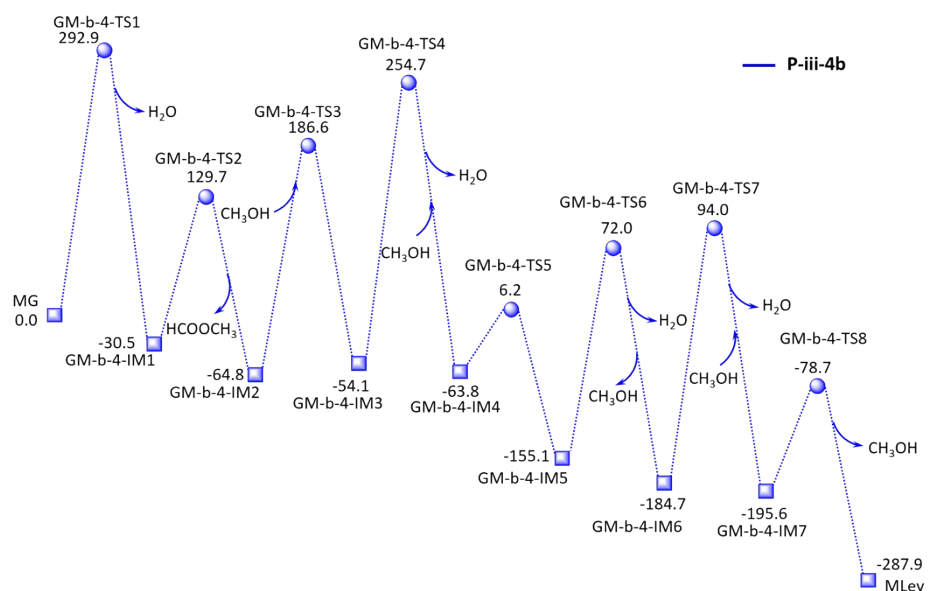

(b)

**Figure S13.** The geometric structures (a) and the schematic energy diagrams (b) with the relative Gibbs free energy ( $G_r$ ,  $\text{kJ mol}^{-1}$ ) relative to the reactants for the dehydration of MG through  $-O_4H$  group with methanol to MF and MLev in the absence of catalyst. For clarity, hydrogen atoms on carbon are not shown. Bond lengths are reported in Å.

---

**NOTES: Evaluation of rate constants:**

The rate constants  $k(T)$  were evaluated according to conventional transition state theory  $k'(T)$ , including the tunneling correction  $\kappa(T)$  based on Wigner's formulation as follows:<sup>1</sup>

$$k' = \frac{k_B T}{h c^0} \cdot e^{-\frac{\Delta G^\ddagger}{RT}}$$

$$\kappa(T) = 1 + \frac{1}{24} \left| \frac{\omega^\ddagger h}{k_B T} \right|^2$$

$$k = \kappa(T) \times k'$$

$$\ln k = -\frac{E_a}{RT} + \ln A$$

$$k = A \cdot e^{-\frac{E_a}{RT}}$$

where  $k_B$  is Boltzmann's constant,  $T$  is the absolute temperature,  $h$  is Planck's constant,  $c^0$  is the standard concentration ( $1 \text{ mol dm}^{-3}$ ),  $\Delta G^\ddagger$  is the activation Gibbs free energy barrier and  $\omega^\ddagger$  is the imaginary frequency of the TS.

**References:**

1. E. Wigner, *J. Chem. Phys.*, 1937, **5**, 720–723.

---

### The equations for calculating TOF according to the energetic span model:

The efficiency of catalyst can be determined by the turnover frequency (TOF) of the catalytic cycle. Based on the transition state theory (TST), the TOF can be calculated by Eqs. (i) and (ii) proposed by Kozuch et al., in which  $\delta E$  (the energetic span) is defined as the energy difference between the summit and trough of the catalytic cycle.<sup>2-7</sup>

$$\text{TOF} = \frac{k_{\text{B}}T}{h} e^{-\delta E/RT}$$

$$\delta E = \begin{pmatrix} G_{\text{DTS}} - G_{\text{DI}} & \text{if DTS appears after DI} \\ G_{\text{DTS}} - G_{\text{DI}} + \Delta G_r & \text{if DTS appears before DI} \end{pmatrix}$$

where  $k_{\text{B}}$  is the Boltzmann constant,  $T$  is the absolute temperature, and  $h$  is the Planck constant.  $G_{\text{DTS}}$  and  $G_{\text{DI}}$  are the Gibbs free energies of the determining transition state (DTS) and the determining intermediate (DI), and  $\Delta G_r$  is the global free energy of the whole cycle.

#### References:

2. C. Amatore and A. Jutand, *J. Organomet. Chem.*, 1999, **576**, 254-278.
3. S. Kozuch and S. Shaik, *J. Am. Chem. Soc.*, 2006, **128**, 3355-3365.
4. S. Kozuch and S. Shaik, *J. Phys. Chem. A*, 2008, **112**, 6032-6041.
5. S. Kozuch and S. Shaik, *Acc. Chem. Res.*, 2011, **44**, 101-110.
6. A. Uhe, S. Kozuch and S. Shaik, *J. Comput. Chem.*, 2011, **32**, 978-985.
7. S. Kozuch, *ACS Catal.*, 2015, **5**, 5242-5255.

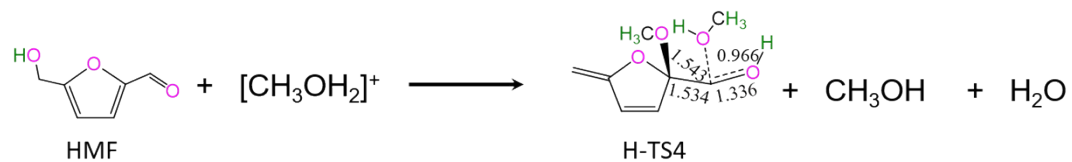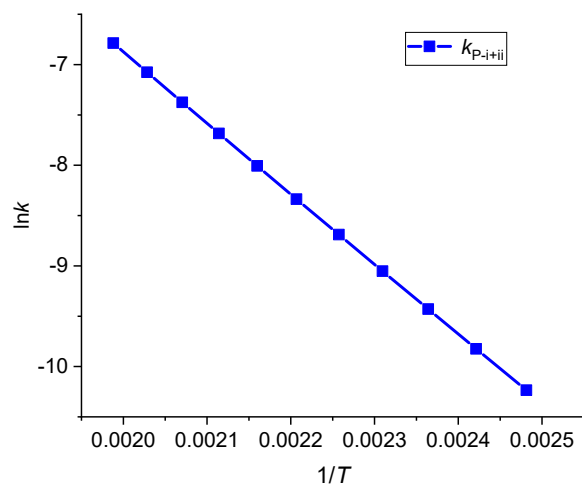

$$k_{P-i+ii} = 1.21 \times 10^3 \exp(-58113 / RT)$$

**Figure S14.** Arrhenius plots of rate constants for the crucial reaction step for **P-i+ii** of fructose to MLev and MF through HMF in the presence of  $[\text{CH}_3\text{OH}_2]^+$  in methanol solution.

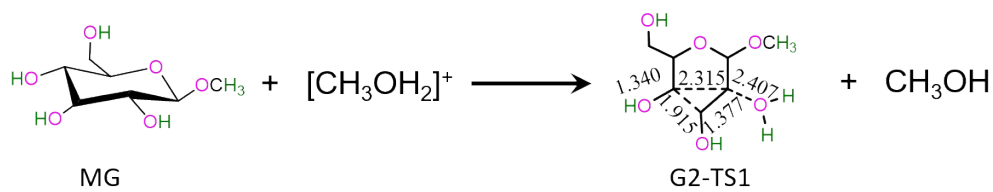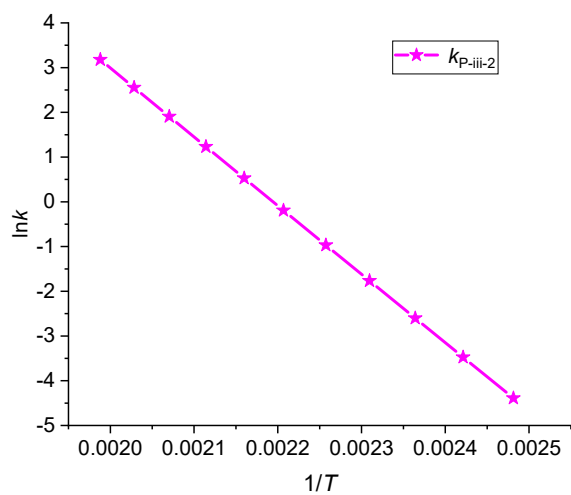

$$k_{\text{P-iii-2}} = 4.18 \times 10^{14} \exp(-127537 / RT)$$

**Figure S15.** Arrhenius plots of rate constants for the crucial reaction step for **P-iii-2** of MG with methanol to MLev and MF through  $-O_2H$  protonated in the presence of  $[CH_3OH_2]^+$  in methanol solution.

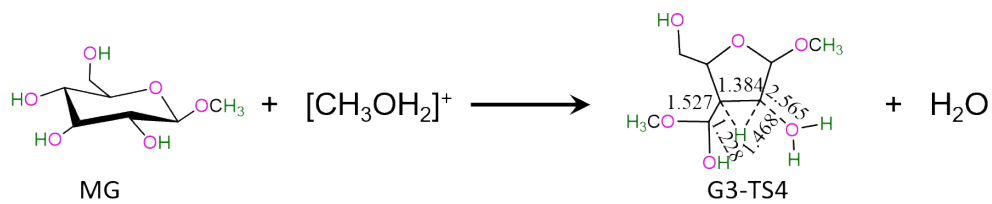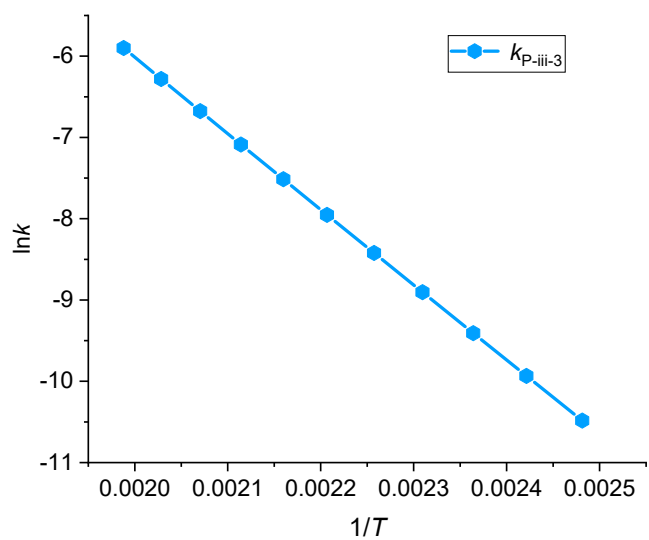

$$k_{\text{P-iii-3}} = 2.86 \times 10^5 \exp(-77254 / RT)$$

**Figure S16.** Arrhenius plots of rate constants for the crucial reaction step for **P-iii-3** of MG with methanol to MLev and MF through -O3H protonated in the presence of [CH<sub>3</sub>OH<sub>2</sub>]<sup>+</sup> in methanol solution.

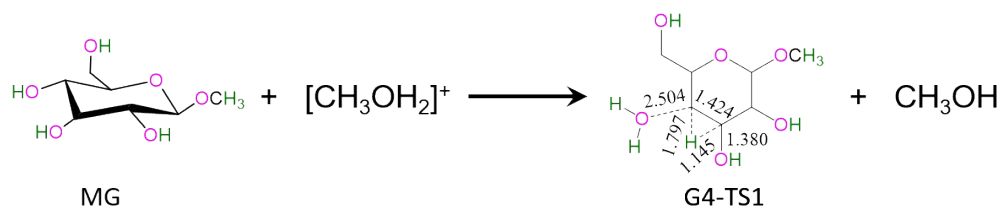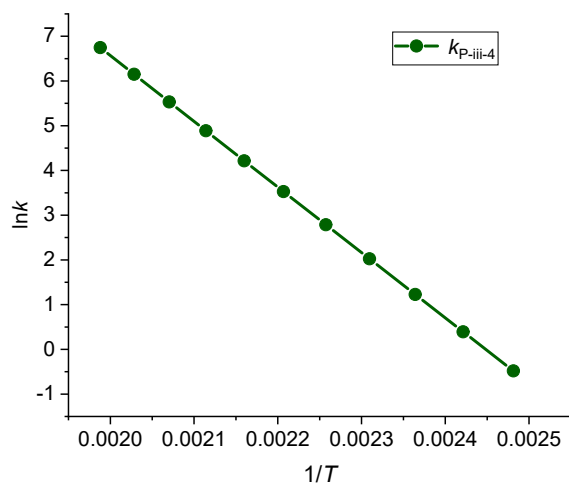

$$k_{\text{P-iii-4}} = 3.49 \times 10^{15} \exp(-131635 / RT)$$

**Figure S17.** Arrhenius plots of rate constants for the crucial reaction step for P-iii-4 of MG with methanol to MLev and MF through -O4H protonated in the presence of [CH<sub>3</sub>OH<sub>2</sub>]<sup>+</sup> in methanol solution.



**Table S1.** The proportion of rate constants ( $k_{p-iii-2}$ ,  $k_{p-iii-3}$  and  $k_{p-iii-4}$ ) for the dehydration of MG with methanol to MF and MLev catalyzed by  $[\text{CH}_3\text{OH}]_4^+$  under the temperature range of 403 – 503 K.

| $k_{p-iii-4}=3.49 \times 10^{15} \exp(-131635/RT)$ | $k_{p-iii-2}=4.18 \times 10^{14} \exp(-127537/RT)$ | $k_{p-iii-3}=2.86 \times 10^5 \exp(-77254/RT)$ | $k_{p-iii-2}/k_{p-iii-2}+k_{p-iii-3}+k_{p-iii-4}$ | $k_{p-iii-3}/k_{p-iii-2}+k_{p-iii-3}+k_{p-iii-4}$ | $k_{p-iii-4}/k_{p-iii-2}+k_{p-iii-3}+k_{p-iii-4}$ |
|----------------------------------------------------|----------------------------------------------------|------------------------------------------------|---------------------------------------------------|---------------------------------------------------|---------------------------------------------------|
| 3.02E-02                                           | 1.23E-02                                           | 2.77E-05                                       | 28.90%                                            | 0.07%                                             | 71.03%                                            |
| 7.83E-02                                           | 3.09E-02                                           | 4.84E-05                                       | 28.31%                                            | 0.04%                                             | 71.65%                                            |
| 1.94E-01                                           | 7.44E-02                                           | 8.25E-05                                       | 27.74%                                            | 0.03%                                             | 72.23%                                            |
| 4.60E-01                                           | 1.72E-01                                           | 1.37E-04                                       | 27.21%                                            | 0.02%                                             | 72.77%                                            |
| 1.05E+00                                           | 3.82E-01                                           | 2.22E-04                                       | 26.70%                                            | 0.02%                                             | 73.28%                                            |
| 2.34E+00                                           | 8.31E-01                                           | 3.56E-04                                       | 26.22%                                            | 0.01%                                             | 73.77%                                            |
| 4.91E+00                                           | 1.71E+00                                           | 5.50E-04                                       | 25.77%                                            | 0.01%                                             | 74.22%                                            |
| 1.01E+01                                           | 3.44E+00                                           | 8.41E-04                                       | 25.35%                                            | 0.01%                                             | 74.65%                                            |
| 2.03E+01                                           | 6.73E+00                                           | 1.26E-03                                       | 24.94%                                            | 0.00%                                             | 75.05%                                            |
| 3.94E+01                                           | 1.28E+01                                           | 1.87E-03                                       | 24.56%                                            | 0.00%                                             | 75.44%                                            |
| 7.46E+01                                           | 2.38E+01                                           | 2.71E-03                                       | 24.19%                                            | 0.00%                                             | 75.81%                                            |

**Table S2.** The proportion of rate constants  $k_{p-iii-2}$ ,  $k_{p-iii-4}$  and  $k_{p-i+ii}$  under the temperature range of 403 – 503 K.

| T   | $k_{p-i+ii}=1.21 \times 10^3 \exp(-58113/RT)$ | $k_{p-iii-4}=3.49 \times 10^{15} \exp(-131635/RT)$ | $k_{p-iii-2}=4.18 \times 10^{14} \exp(-127537/RT)$ | $k_{p-iii-4}/k_{p-i+ii}$ | $k_{p-iii-2}/k_{p-i+ii}$ |
|-----|-----------------------------------------------|----------------------------------------------------|----------------------------------------------------|--------------------------|--------------------------|
| 405 | 3.87E-05                                      | 3.67E-02                                           | 1.48E-02                                           | 9.49E+02                 | 3.84E+02                 |
| 415 | 5.86E-05                                      | 9.41E-02                                           | 3.70E-02                                           | 1.61E+03                 | 6.31E+02                 |
| 425 | 8.71E-05                                      | 2.31E-01                                           | 8.82E-02                                           | 2.65E+03                 | 1.01E+03                 |
| 435 | 1.27E-04                                      | 5.44E-01                                           | 2.02E-01                                           | 4.28E+03                 | 1.59E+03                 |
| 445 | 1.82E-04                                      | 1.23E+00                                           | 4.47E-01                                           | 6.76E+03                 | 2.45E+03                 |
| 455 | 2.58E-04                                      | 2.69E+00                                           | 9.53E-01                                           | 1.05E+04                 | 3.70E+03                 |
| 465 | 3.59E-04                                      | 5.69E+00                                           | 1.97E+00                                           | 1.59E+04                 | 5.49E+03                 |
| 475 | 4.92E-04                                      | 1.17E+01                                           | 3.94E+00                                           | 2.37E+04                 | 8.01E+03                 |
| 485 | 6.66E-04                                      | 2.32E+01                                           | 7.67E+00                                           | 3.48E+04                 | 1.15E+04                 |
| 495 | 8.92E-04                                      | 4.48E+01                                           | 1.45E+01                                           | 5.03E+04                 | 1.63E+04                 |
| 505 | 1.18E-03                                      | 8.45E+01                                           | 2.68E+01                                           | 7.16E+04                 | 2.28E+04                 |

**Table S3.** Zero-point energies ( $ZPE$ , hartree), thermal correction to Gibbs free energy ( $G_0$ , hartree), total energies ( $E_c$ , hartree) corrected by  $ZPE$ , sum of electronic and thermal free energies ( $G_c$ , hartree) with  $ZPE$  and thermal corrections, and relative energies ( $E_r$ ,  $\text{kJ mol}^{-1}$ ) and relative Gibbs free energies ( $G_r$ ,  $\text{kJ mol}^{-1}$ ) relative to  $\beta$ -D-fructofuranoses for five configurations of fructose at PBE0/6-311++G(d,p) level in methanol solution.

| Species                     | ZPE     | $E_c$      | $G_0$   | $G_c$      | $E_r$ | $G_r$ |
|-----------------------------|---------|------------|---------|------------|-------|-------|
| $\beta$ -D-fructofuranoses  | 0.19778 | -686.49060 | 0.13320 | -686.55518 | 0.0   | 0.0   |
| $\beta$ -D-fructopyranoses  | 0.19920 | -686.48846 | 0.13918 | -686.54848 | 5.6   | 17.6  |
| $\alpha$ -D-fructofuranoses | 0.19832 | -686.48681 | 0.13576 | -686.54937 | 10.0  | 15.2  |
| $\alpha$ -D-fructopyranoses | 0.19768 | -686.48785 | 0.13539 | -686.55014 | 7.2   | 13.2  |
| D-fructoketose              | 0.19483 | -686.48160 | 0.12709 | -686.54934 | 23.6  | 15.3  |

**Table S4.** Zero-point energies (*ZPE*, hartree), thermal correction to Gibbs free energy ( $G_0$ , hartree), total energies ( $E_c$ , hartree) corrected by *ZPE*, sum of electronic and thermal free energies ( $G_c$ , hartree) with *ZPE* and thermal corrections, and relative energies ( $E_r$ , kJ mol<sup>-1</sup>) and relative Gibbs free energies ( $G_r$ , kJ mol<sup>-1</sup>) relative to HMF-1 for eight tautomers of 5-hydroxymethylfurfural at PBE0/6-311++G(d,p) level in methanol solution.

| Species | ZPE     | $E_c$      | $G_0$   | $G_c$      | $E_r$ | $G_r$ |
|---------|---------|------------|---------|------------|-------|-------|
| HMF-1   | 0.11257 | -457.40525 | 0.05813 | -457.45969 | 0.0   | 0.0   |
| HMF-2   | 0.11317 | -457.40574 | 0.06010 | -457.45881 | -1.3  | 2.3   |
| HMF-3   | 0.11275 | -457.40530 | 0.05955 | -457.45850 | -0.1  | 3.1   |
| HMF-4   | 0.11295 | -457.40411 | 0.06001 | -457.45705 | 3.0   | 6.9   |
| HMF-5   | 0.11237 | -457.40382 | 0.05825 | -457.45794 | 3.8   | 4.6   |
| HMF-6   | 0.11320 | -457.40546 | 0.06057 | -457.45808 | -0.5  | 4.2   |
| HMF-7   | 0.11256 | -457.40334 | 0.05948 | -457.45642 | 5.0   | 8.6   |
| HMF-8   | 0.11300 | -457.40377 | 0.06053 | -457.45624 | 3.9   | 9.1   |

**Table S5.** Zero-point energies (*ZPE*, hartree), thermal correction to Gibbs free energy ( $G_0$ , hartree), total energies ( $E_c$ , hartree) corrected by *ZPE*, Sum of electronic and thermal free energies ( $G_c$ , hartree) with *ZPE* and thermal corrections, and relative energies ( $E_r$ , kJ mol<sup>-1</sup>) and relative Gibbs free energies ( $G_r$ , kJ mol<sup>-1</sup>) for the dehydration of fructose to HMF-1 in the absence of catalyst at PBE0/6-311++G (d, p) level in methanol solution.

| Species                                         | ZPE     | $E_c$      | $G_0$    | $G_c$      | $E_r$ | $G_r$  |
|-------------------------------------------------|---------|------------|----------|------------|-------|--------|
| CH <sub>3</sub> OH                              | 0.05138 | -115.58419 | 0.01855  | -115.61702 |       |        |
| [CH <sub>3</sub> OH <sub>2</sub> ] <sup>+</sup> | 0.06379 | -115.98600 | 0.03036  | -116.01943 |       |        |
| H <sub>2</sub> O                                | 0.02133 | -76.36469  | -0.00328 | -76.38930  |       |        |
| <i>β</i> -D-fructofuranoses                     | 0.19778 | -686.49060 | 0.13320  | -686.55518 | 0.0   | 0.0    |
| F-b-1-TS1                                       | 0.19001 | -686.40492 | 0.12012  | -686.47481 | 225.0 | 211.0  |
| F-b-1-IM1                                       | 0.19387 | -686.47406 | 0.12402  | -686.54391 | 43.4  | 29.6   |
| F-b-1-IM2                                       | 0.16909 | -610.10664 | 0.10724  | -610.16849 |       |        |
| F-b-1-IM2 + H <sub>2</sub> O                    | 0.19042 | -686.47133 | 0.10397  | -686.55779 | 50.6  | -6.9   |
| F-b-2-TS1                                       | 0.16643 | -610.05644 | 0.10683  | -610.11604 |       |        |
| F-b-2-TS1 + H <sub>2</sub> O                    | 0.18777 | -686.42113 | 0.10356  | -686.50534 | 182.4 | 130.8  |
| F-b-2-TS1a                                      | 0.16307 | -610.00744 | 0.10217  | -610.06834 |       |        |
| F-b-2-TS1a + H <sub>2</sub> O                   | 0.18440 | -686.37212 | 0.09889  | -686.45764 | 311.1 | 256.1  |
| F-b-2-IM1                                       | 0.16827 | -610.11297 | 0.10538  | -610.17587 |       |        |
| F-b-2-IM1 + H <sub>2</sub> O                    | 0.18960 | -686.47766 | 0.10210  | -686.56517 | 34.0  | -26.2  |
| F-b-2-TS2a                                      | 0.16268 | -610.03380 | 0.10304  | -610.09343 |       |        |
| F-b-2-TS2a + H <sub>2</sub> O                   | 0.18401 | -686.39849 | 0.09976  | -686.48273 | 241.8 | 190.2  |
| F-b-2-IM2                                       | 0.16452 | -610.11099 | 0.09551  | -610.18001 |       |        |
| F-b-2-IM2 + H <sub>2</sub> O                    | 0.18585 | -686.47568 | 0.09223  | -686.56931 | 39.2  | -37.1  |
| F-b-2-IM3                                       | 0.14023 | -533.74449 | 0.08291  | -533.80182 |       |        |
| F-b-2-IM3 + 2*H <sub>2</sub> O                  | 0.18290 | -686.47386 | 0.07635  | -686.58041 | 44.0  | -66.3  |
| F-b-3-TS1                                       | 0.13452 | -533.67207 | 0.07454  | -533.73205 |       |        |
| F-b-3-TS1 + 2*H <sub>2</sub> O                  | 0.17718 | -686.40144 | 0.06798  | -686.51064 | 234.1 | 116.9  |
| F-b-3-IM1                                       | 0.13578 | -533.76794 | 0.06852  | -533.83520 |       |        |
| F-b-3-IM1 + 2*H <sub>2</sub> O                  | 0.17844 | -686.49731 | 0.06196  | -686.61379 | -17.6 | -153.9 |
| HMF-1                                           | 0.11257 | -457.40525 | 0.05813  | -457.45969 |       |        |
| HMF-1 + 3*H <sub>2</sub> O                      | 0.17657 | -686.49931 | 0.04829  | -686.62759 | -22.9 | -190.1 |

**Table S6.** Zero-point energies (*ZPE*, hartree), thermal correction to Gibbs free energy ( $G_0$ , hartree), total energies ( $E_c$ , hartree) corrected by *ZPE*, sum of electronic and thermal free energies ( $G_c$ , hartree) with *ZPE* and thermal corrections, and relative energies ( $E_r$ , kJ mol<sup>-1</sup>) and relative Gibbs free energies ( $G_r$ , kJ mol<sup>-1</sup>) for the dehydration of fructose to HMF-1 in the presence of explicit CH<sub>3</sub>OH at PBE0/6-311++G (d, p) level in methanol solution.

| Species                                             | ZPE     | $E_c$      | $G_0$    | $G_c$      | $E_r$ | $G_r$  |
|-----------------------------------------------------|---------|------------|----------|------------|-------|--------|
| CH <sub>3</sub> OH                                  | 0.05138 | -115.58419 | 0.01855  | -115.61702 |       |        |
| [CH <sub>3</sub> OH <sub>2</sub> ] <sup>+</sup>     | 0.06379 | -115.98600 | 0.03036  | -116.01943 |       |        |
| H <sub>2</sub> O                                    | 0.02133 | -76.36469  | -0.00328 | -76.38930  |       |        |
| <i>β</i> -D-fructofuranoses                         | 0.19778 | -686.49060 | 0.13320  | -686.55518 | 0.0   | 0.0    |
| F-M-1-IM1                                           | 0.25246 | -802.07990 | 0.17687  | -802.15550 |       |        |
| F-M-1-IM1 - CH <sub>3</sub> OH                      | 0.20108 | -686.49572 | 0.15832  | -686.53848 | -13.4 | 43.8   |
| F-M-1-TS1                                           | 0.24244 | -802.00585 | 0.16305  | -802.08525 |       |        |
| F-M-1-TS1 - CH <sub>3</sub> OH                      | 0.19106 | -686.42167 | 0.14450  | -686.46823 | 181.0 | 228.3  |
| F-M-2-IM1                                           | 0.22349 | -725.69439 | 0.15131  | -725.76657 |       |        |
| F-M-2-IM1 - CH <sub>3</sub> OH + H <sub>2</sub> O   | 0.19344 | -686.47489 | 0.12948  | -686.53885 | 41.3  | 42.9   |
| F-M-2-TS2                                           | 0.22135 | -725.66326 | 0.15231  | -725.73231 |       |        |
| F-M-2-TS2 - CH <sub>3</sub> OH + H <sub>2</sub> O   | 0.19130 | -686.44377 | 0.13048  | -686.50458 | 123.0 | 132.8  |
| F-M-3-IM1                                           | 0.19365 | -649.33285 | 0.12003  | -649.40647 |       |        |
| F-M-3-IM1 - CH <sub>3</sub> OH + 2*H <sub>2</sub> O | 0.18493 | -686.47803 | 0.09492  | -686.56804 | 33.0  | -33.8  |
| F-M-3-TS3                                           | 0.18437 | -649.27351 | 0.11394  | -649.34395 |       |        |
| F-M-3-TS3 - CH <sub>3</sub> OH + 2*H <sub>2</sub> O | 0.17565 | -686.41870 | 0.08883  | -686.50552 | 188.8 | 130.4  |
| HMF-1                                               | 0.11257 | -457.40525 | 0.05813  | -457.45969 |       |        |
| HMF-1 + 3*H <sub>2</sub> O                          | 0.17657 | -686.49931 | 0.04829  | -686.62759 | -22.9 | -190.1 |

**Table S7.** Zero-point energies (*ZPE*, hartree), thermal correction to Gibbs free energy ( $G_0$ , hartree), total energies ( $E_c$ , hartree) corrected by *ZPE*, sum of electronic and thermal free energies ( $G_c$ , hartree) with *ZPE* and thermal corrections, and relative energies ( $E_r$ , kJ mol<sup>-1</sup>) and relative Gibbs free energies ( $G_r$ , kJ mol<sup>-1</sup>) for the dehydration of fructose to HMF-1 catalyzed by [CH<sub>3</sub>OH<sub>2</sub>]<sup>+</sup> at PBE0/6-311++G (d, p) level in methanol solution.

| Species                                                                        | ZPE     | $E_c$      | $G_0$    | $G_c$      | $E_r$ | $G_r$  |
|--------------------------------------------------------------------------------|---------|------------|----------|------------|-------|--------|
| CH <sub>3</sub> OH                                                             | 0.05138 | -115.58419 | 0.01855  | -115.61702 |       |        |
| [CH <sub>3</sub> OH <sub>2</sub> ] <sup>+</sup>                                | 0.06379 | -115.98600 | 0.03036  | -116.01943 |       |        |
| H <sub>2</sub> O                                                               | 0.02133 | -76.36469  | -0.00328 | -76.38930  |       |        |
| <i>β</i> -D-fructofuranoses                                                    | 0.19778 | -686.49060 | 0.13320  | -686.55518 | 0.0   | 0.0    |
| F-1-IM1                                                                        | 0.26414 | -802.49289 | 0.18746  | -802.56956 |       |        |
| F-1-IM1 - [CH <sub>3</sub> OH <sub>2</sub> ] <sup>+</sup>                      | 0.20035 | -686.50688 | 0.15710  | -686.55013 | -42.7 | 13.2   |
| F-1-TS1                                                                        | 0.26100 | -802.47972 | 0.18195  | -802.55877 |       |        |
| F-1-TS1 - [CH <sub>3</sub> OH <sub>2</sub> ] <sup>+</sup>                      | 0.19722 | -686.49371 | 0.15159  | -686.53934 | -8.2  | 41.6   |
| F-1-IM2                                                                        | 0.25911 | -802.48312 | 0.17373  | -802.56850 |       |        |
| F-1-IM2 - [CH <sub>3</sub> OH <sub>2</sub> ] <sup>+</sup>                      | 0.19532 | -686.49712 | 0.14337  | -686.54907 | -17.1 | 16.0   |
| F-1-IM3                                                                        | 0.23477 | -726.11017 | 0.15701  | -726.18792 |       |        |
| F-1-IM3 - [CH <sub>3</sub> OH <sub>2</sub> ] <sup>+</sup> + H <sub>2</sub> O   | 0.19231 | -686.48885 | 0.12337  | -686.55779 | 4.6   | -6.9   |
| F-1-TS2                                                                        | 0.23022 | -726.09891 | 0.15712  | -726.17201 |       |        |
| F-1-TS2 - [CH <sub>3</sub> OH <sub>2</sub> ] <sup>+</sup> + H <sub>2</sub> O   | 0.18776 | -686.47760 | 0.12348  | -686.54188 | 34.2  | 34.9   |
| F-1-IM4                                                                        | 0.23500 | -726.11384 | 0.16110  | -726.18774 |       |        |
| F-1-IM4 - [CH <sub>3</sub> OH <sub>2</sub> ] <sup>+</sup> + H <sub>2</sub> O   | 0.19255 | -686.49252 | 0.12746  | -686.55761 | -5.0  | -6.4   |
| F-2-TS1                                                                        | 0.23252 | -726.09006 | 0.15715  | -726.16543 |       |        |
| F-2-TS1 - [CH <sub>3</sub> OH <sub>2</sub> ] <sup>+</sup> + H <sub>2</sub> O   | 0.19007 | -686.46874 | 0.12351  | -686.53530 | 57.4  | 52.2   |
| F-2-IM1                                                                        | 0.23229 | -726.10963 | 0.15480  | -726.18712 |       |        |
| F-2-IM1 - [CH <sub>3</sub> OH <sub>2</sub> ] <sup>+</sup> + H <sub>2</sub> O   | 0.18984 | -686.48831 | 0.12116  | -686.55699 | 6.0   | -4.8   |
| F-3-IM1                                                                        | 0.20643 | -649.75575 | 0.13660  | -649.82559 |       |        |
| F-3-IM1 - [CH <sub>3</sub> OH <sub>2</sub> ] <sup>+</sup> + 2*H <sub>2</sub> O | 0.18531 | -686.49912 | 0.09968  | -686.58476 | -22.4 | -77.7  |
| F-3-TS1                                                                        | 0.20335 | -649.73526 | 0.12978  | -649.80882 |       |        |
| F-3-TS1 - [CH <sub>3</sub> OH <sub>2</sub> ] <sup>+</sup> + 2*H <sub>2</sub> O | 0.18222 | -686.47863 | 0.09286  | -686.56799 | 31.4  | -33.6  |
| F-3-IM2                                                                        | 0.17726 | -573.37373 | 0.10750  | -573.44349 |       |        |
| F-3-IM2 - [CH <sub>3</sub> OH <sub>2</sub> ] <sup>+</sup> + 3*H <sub>2</sub> O | 0.17747 | -686.48179 | 0.06730  | -686.59196 | 23.1  | -96.6  |
| F-3-TS2                                                                        | 0.17454 | -573.37304 | 0.10914  | -573.43844 |       |        |
| F-3-TS2 - [CH <sub>3</sub> OH <sub>2</sub> ] <sup>+</sup> + 3*H <sub>2</sub> O | 0.17475 | -686.48109 | 0.06894  | -686.58690 | 25.0  | -83.3  |
| F-3-IM3                                                                        | 0.18084 | -573.39460 | 0.11341  | -573.46203 |       |        |
| F-3-IM3 - [CH <sub>3</sub> OH <sub>2</sub> ] <sup>+</sup> + 3*H <sub>2</sub> O | 0.18105 | -686.50266 | 0.07321  | -686.61050 | -31.7 | -145.3 |
| HMF-1                                                                          | 0.11257 | -457.40525 | 0.05813  | -457.45969 |       |        |
| HMF-1 + 3*H <sub>2</sub> O                                                     | 0.17657 | -686.49931 | 0.04829  | -686.62759 | -22.9 | -190.1 |

**Table S8.** Zero-point energies (*ZPE*, hartree), thermal correction to Gibbs free energy ( $G_0$ , hartree), total energies ( $E_c$ , hartree) corrected by *ZPE*, sum of electronic and thermal free energies ( $G_c$ , hartree) with *ZPE* and thermal corrections, and relative energies ( $E_r$ , kJ mol<sup>-1</sup>) and relative Gibbs free energies ( $G_r$ , kJ mol<sup>-1</sup>) for the first and second conversion of HMF-1 with methanol to MF and MLev in the presence of CH<sub>3</sub>OH at PBE0/6-311++G (d, p) level in methanol solution.

| Species                                                                    | ZPE     | $E_c$      | $G_0$    | $G_c$      | $E_r$ | $G_r$ |
|----------------------------------------------------------------------------|---------|------------|----------|------------|-------|-------|
| CH <sub>3</sub> OH                                                         | 0.05138 | -115.58419 | 0.01855  | -115.61702 |       |       |
| [CH <sub>3</sub> OH <sub>2</sub> ] <sup>+</sup>                            | 0.06379 | -115.98600 | 0.03036  | -116.01943 |       |       |
| H <sub>2</sub> O                                                           | 0.02133 | -76.36469  | -0.00328 | -76.38930  |       |       |
| HCOOCH <sub>3</sub>                                                        | 0.06177 | -228.81914 | 0.02343  | -228.85748 |       |       |
| HMF-1                                                                      | 0.11257 | -457.40525 | 0.05813  | -457.45969 | 0.0   | 0.0   |
| HM-b-1-IM1                                                                 | 0.13733 | -533.77293 | 0.07471  | -533.83556 |       |       |
| HM-b-1-IM1 - H <sub>2</sub> O                                              | 0.11600 | -457.40825 | 0.07799  | -457.44626 | -7.9  | 35.3  |
| HM-b-1-TS1                                                                 | 0.13367 | -533.67471 | 0.07725  | -533.73113 |       |       |
| HM-b-1-TS1 - H <sub>2</sub> O                                              | 0.11234 | -457.31002 | 0.08053  | -457.34183 | 250.0 | 309.4 |
| HM-b-1-IM2                                                                 | 0.13938 | -533.75321 | 0.08147  | -533.81111 |       |       |
| HM-b-1-IM2 - H <sub>2</sub> O                                              | 0.11804 | -457.38852 | 0.08475  | -457.42181 | 43.9  | 99.5  |
| HM-b-1-TS2                                                                 | 0.13311 | -533.65197 | 0.07486  | -533.71022 |       |       |
| HM-b-1-TS2 - H <sub>2</sub> O                                              | 0.11178 | -457.28728 | 0.07814  | -457.32092 | 309.7 | 364.3 |
| HM-b-1-IM3                                                                 | 0.13912 | -533.75315 | 0.08304  | -533.80923 |       |       |
| HM-b-1-IM3 - H <sub>2</sub> O                                              | 0.11778 | -457.38847 | 0.08632  | -457.41993 | 44.1  | 104.4 |
| HM-b-1-TS3                                                                 | 0.13150 | -533.65931 | 0.07518  | -533.71563 |       |       |
| HM-b-1-TS3 - H <sub>2</sub> O                                              | 0.11017 | -457.29462 | 0.07846  | -457.32633 | 290.4 | 350.1 |
| HM-b-1-IM4                                                                 | 0.11069 | -457.38404 | 0.05854  | -457.43619 | 55.7  | 61.7  |
| HM-b-1-TS4                                                                 | 0.16388 | -572.87730 | 0.10438  | -572.93680 |       |       |
| HM-b-1-TS4 - CH <sub>3</sub> OH                                            | 0.11250 | -457.29311 | 0.08583  | -457.31978 | 294.4 | 367.3 |
| HM-b-1-IM5                                                                 | 0.16719 | -572.97899 | 0.10623  | -573.03995 |       |       |
| HM-b-1-IM5 - CH <sub>3</sub> OH                                            | 0.11581 | -457.39480 | 0.08768  | -457.42293 | 27.4  | 96.5  |
| HM-b-1-TS5                                                                 | 0.16186 | -572.88223 | 0.09714  | -572.94695 |       |       |
| HM-b-1-TS5 - CH <sub>3</sub> OH                                            | 0.11047 | -457.29805 | 0.07859  | -457.32993 | 281.5 | 340.7 |
| HM-b-1-IM6                                                                 | 0.10233 | -344.16375 | 0.05630  | -344.20978 |       |       |
| HM-b-1-IM6 - CH <sub>3</sub> OH - HCOOCH <sub>3</sub>                      | 0.11271 | -457.39871 | 0.06118  | -457.45024 | 17.2  | 24.8  |
| HM-b-1-TS6                                                                 | 0.12332 | -420.44208 | 0.07348  | -420.49192 |       |       |
| HM-b-1-TS6 - CH <sub>3</sub> OH - HCOOCH <sub>3</sub> + H <sub>2</sub> O   | 0.11237 | -457.31235 | 0.08164  | -457.34308 | 243.9 | 306.2 |
| HM-b-1-IM7                                                                 | 0.13078 | -420.53531 | 0.08040  | -420.58569 |       |       |
| HM-b-1-IM7 - CH <sub>3</sub> OH - HCOOCH <sub>3</sub> + H <sub>2</sub> O   | 0.11983 | -457.40557 | 0.08856  | -457.43685 | -0.8  | 60.0  |
| HM-b-1-TS7                                                                 | 0.12355 | -420.42084 | 0.07360  | -420.47080 |       |       |
| HM-b-1-TS7 - CH <sub>3</sub> OH - HCOOCH <sub>3</sub> + H <sub>2</sub> O   | 0.11260 | -457.29111 | 0.08176  | -457.32196 | 299.7 | 361.6 |
| HM-b-1-IM8                                                                 | 0.13038 | -420.53719 | 0.07914  | -420.58843 |       |       |
| HM-b-1-IM8 - CH <sub>3</sub> OH - HCOOCH <sub>3</sub> + H <sub>2</sub> O   | 0.11943 | -457.40746 | 0.08730  | -457.43959 | -5.8  | 52.8  |
| HM-b-1-TS8                                                                 | 0.17936 | -536.06245 | 0.11499  | -536.12682 |       |       |
| HM-b-1-TS8 - 2*CH <sub>3</sub> OH - HCOOCH <sub>3</sub> + H <sub>2</sub> O | 0.11703 | -457.34853 | 0.10460  | -457.36096 | 148.9 | 259.2 |
| HM-b-1-IM9                                                                 | 0.18468 | -536.12704 | 0.12242  | -536.18930 |       |       |
| HM-b-1-IM9 - 2*CH <sub>3</sub> OH - HCOOCH <sub>3</sub> + H <sub>2</sub> O | 0.12235 | -457.41312 | 0.11203  | -457.42344 | -20.7 | 95.2  |



## Continued from Table S8

| Species                                                                     | ZPE     | $E_c$      | $G_0$   | $G_c$      | $E_r$  | $G_r$  |
|-----------------------------------------------------------------------------|---------|------------|---------|------------|--------|--------|
| HM-b-1-TS9                                                                  | 0.23616 | -651.67085 | 0.16452 | -651.74249 |        |        |
| HM-b-1-TS9 - 3*CH <sub>3</sub> OH - HCOOCH <sub>3</sub> + H <sub>2</sub> O  | 0.12244 | -457.37275 | 0.13558 | -457.35961 | 85.3   | 262.8  |
| HM-b-1-IM10                                                                 | 0.18412 | -536.14594 | 0.12116 | -536.20890 |        |        |
| HM-b-1-IM10 - 2*CH <sub>3</sub> OH - HCOOCH <sub>3</sub> + H <sub>2</sub> O | 0.12179 | -457.43202 | 0.11077 | -457.44304 | -70.3  | 43.7   |
| HM-b-1-TS10                                                                 | 0.17750 | -536.03112 | 0.11243 | -536.09620 |        |        |
| HM-b-1-TS10 - 2*CH <sub>3</sub> OH - HCOOCH <sub>3</sub> + H <sub>2</sub> O | 0.11517 | -457.31720 | 0.10203 | -457.33034 | 231.2  | 339.6  |
| HM-b-1-IM11                                                                 | 0.15510 | -459.77067 | 0.09415 | -459.83163 |        |        |
| HM-b-1-IM11 - 2*CH <sub>3</sub> OH - HCOOCH <sub>3</sub>                    | 0.11410 | -457.42144 | 0.08048 | -457.45507 | -42.5  | 12.1   |
| HM-b-1-TS11                                                                 | 0.20496 | -575.33764 | 0.13623 | -575.40637 |        |        |
| HM-b-1-TS11 - 3*CH <sub>3</sub> OH - HCOOCH <sub>3</sub>                    | 0.11258 | -457.40422 | 0.10401 | -457.41279 | 2.7    | 123.1  |
| HM-b-2-TS8                                                                  | 0.12475 | -420.47005 | 0.07435 | -420.52045 |        |        |
| HM-b-2-TS8 - CH <sub>3</sub> OH - HCOOCH <sub>3</sub> + H <sub>2</sub> O    | 0.11380 | -457.34032 | 0.08251 | -457.37161 | 170.5  | 231.2  |
| HM-b-2-IM9                                                                  | 0.12735 | -420.52957 | 0.07213 | -420.58479 |        |        |
| HM-b-2-IM9 - CH <sub>3</sub> OH - HCOOCH <sub>3</sub> + H <sub>2</sub> O    | 0.11640 | -457.39984 | 0.08029 | -457.43595 | 14.2   | 62.3   |
| HM-b-2-TS9                                                                  | 0.17949 | -536.07366 | 0.11560 | -536.13754 |        |        |
| HM-b-2-TS9 - 2*CH <sub>3</sub> OH - HCOOCH <sub>3</sub> + H <sub>2</sub> O  | 0.11715 | -457.35974 | 0.10521 | -457.37168 | 119.5  | 231.1  |
| HM-b-2-IM10                                                                 | 0.12723 | -420.54779 | 0.07230 | -420.60272 |        |        |
| HM-b-2-IM10 - CH <sub>3</sub> OH - HCOOCH <sub>3</sub> + H <sub>2</sub> O   | 0.11628 | -457.41806 | 0.08046 | -457.45387 | -33.6  | 15.3   |
| HM-b-2-TS10                                                                 | 0.17836 | -536.08574 | 0.11458 | -536.14953 |        |        |
| HM-b-2-TS10 - 2*CH <sub>3</sub> OH - HCOOCH <sub>3</sub> + H <sub>2</sub> O | 0.11603 | -457.37182 | 0.10418 | -457.38367 | 87.8   | 199.6  |
| Mlev                                                                        | 0.15586 | -459.81561 | 0.09582 | -459.87564 |        |        |
| MLev - 2*CH <sub>3</sub> OH + HCOOCH <sub>3</sub>                           | 0.11485 | -457.46637 | 0.08215 | -457.49908 | -160.5 | -103.4 |

**Table S9.** Zero-point energies ( $ZPE$ , hartree), thermal correction to Gibbs free energy ( $G_0$ , hartree), total energies ( $E_c$ , hartree) corrected by  $ZPE$ , sum of electronic and thermal free energies ( $G_c$ , hartree) with  $ZPE$  and thermal corrections, and relative energies ( $E_r$ ,  $\text{kJ mol}^{-1}$ ) and relative Gibbs free energies ( $G_r$ ,  $\text{kJ mol}^{-1}$ ) for the third conversion of HMF-1 with methanol to MF and MLev in the presence of  $\text{CH}_3\text{OH}$  at PBE0/6-311++G (d, p) level in methanol solution.

| Species                                                                        | ZPE     | $E_c$      | $G_0$   | $G_c$      | $E_r$  | $G_r$ |
|--------------------------------------------------------------------------------|---------|------------|---------|------------|--------|-------|
| HM-b-3-TS6                                                                     | 0.12345 | -420.44370 | 0.07363 | -420.49352 |        |       |
| HM-b-3-TS6 - $\text{CH}_3\text{OH}$ - $\text{HCOOCH}_3$ + $\text{H}_2\text{O}$ | 0.11250 | -457.31397 | 0.08179 | -457.34468 | 239.7  | 302.0 |
| HM-b-3-IM7                                                                     | 0.13050 | -420.53510 | 0.07994 | -420.58567 |        |       |
| HM-b-3-IM7 - $\text{CH}_3\text{OH}$ - $\text{HCOOCH}_3$ + $\text{H}_2\text{O}$ | 0.11955 | -457.40537 | 0.08810 | -457.43683 | -0.3   | 60.0  |
| HM-b-3-TS7                                                                     | 0.12380 | -420.41914 | 0.07358 | -420.46937 |        |       |
| HM-b-3-TS7 - $\text{CH}_3\text{OH}$ - $\text{HCOOCH}_3$ + $\text{H}_2\text{O}$ | 0.11285 | -457.28941 | 0.08173 | -457.32053 | 304.1  | 365.4 |
| HM-b-3-IM8                                                                     | 0.13002 | -420.54042 | 0.07869 | -420.59174 |        |       |
| HM-b-3-IM8 - $\text{CH}_3\text{OH}$ - $\text{HCOOCH}_3$ + $\text{H}_2\text{O}$ | 0.11907 | -457.41069 | 0.08685 | -457.44290 | -14.3  | 44.1  |
| HM-b-3-TS8                                                                     | 0.12281 | -420.43862 | 0.07034 | -420.49110 |        |       |
| HM-b-3-TS8 - $\text{CH}_3\text{OH}$ - $\text{HCOOCH}_3$ + $\text{H}_2\text{O}$ | 0.11186 | -457.30889 | 0.07849 | -457.34226 | 253.0  | 308.3 |
| HM-b-3-IM9                                                                     | 0.10148 | -344.18265 | 0.05380 | -344.23032 |        |       |
| HM-b-3-IM9 - $\text{CH}_3\text{OH}$ - $\text{HCOOCH}_3$                        | 0.11186 | -457.41760 | 0.05868 | -457.47078 | -32.4  | -29.1 |
| HM-b-3-TS9                                                                     | 0.15189 | -459.70546 | 0.09338 | -459.76397 |        |       |
| HM-b-3-TS9 - $2^*\text{CH}_3\text{OH}$ - $\text{HCOOCH}_3$                     | 0.11089 | -457.35622 | 0.07971 | -457.38741 | 128.7  | 189.8 |
| HM-b-3-IM10                                                                    | 0.15734 | -459.78005 | 0.10243 | -459.83496 |        |       |
| HM-b-3-IM10 - $2^*\text{CH}_3\text{OH}$ - $\text{HCOOCH}_3$                    | 0.11634 | -457.43082 | 0.08875 | -457.45840 | -67.1  | 3.4   |
| HM-b-3-TS10                                                                    | 0.15578 | -459.74565 | 0.10174 | -459.79969 |        |       |
| HM-b-3-TS10 - $2^*\text{CH}_3\text{OH}$ - $\text{HCOOCH}_3$                    | 0.11478 | -457.39642 | 0.08807 | -457.42313 | 23.2   | 96.0  |
| HM-b-3-IM11                                                                    | 0.15658 | -459.79500 | 0.09721 | -459.85437 |        |       |
| HM-b-3-IM11 - $2^*\text{CH}_3\text{OH}$ - $\text{HCOOCH}_3$                    | 0.11557 | -457.44577 | 0.08354 | -457.47781 | -106.4 | -47.6 |
| HM-b-3-TS11                                                                    | 0.20653 | -575.34264 | 0.13904 | -575.41013 |        |       |
| HM-b-3-TS11 - $3^*\text{CH}_3\text{OH}$ - $\text{HCOOCH}_3$                    | 0.11414 | -457.40922 | 0.10682 | -457.41655 | -10.4  | 113.3 |

**Table S10.** Zero-point energies (*ZPE*, hartree), thermal correction to Gibbs free energy ( $G_0$ , hartree), total energies ( $E_c$ , hartree) corrected by *ZPE*, sum of electronic and thermal free energies ( $G_c$ , hartree) with *ZPE* and thermal corrections, and relative energies ( $E_r$ , kJ mol<sup>-1</sup>) and relative Gibbs free energies ( $G_r$ , kJ mol<sup>-1</sup>) for the forth conversion of HMF-1 with methanol to MF and MLev in the presence of CH<sub>3</sub>OH at PBE0/6-311++G (d, p) level in methanol solution.

| Species                                                                     | ZPE     | $E_c$      | $G_0$   | $G_c$      | $E_r$ | $G_r$ |
|-----------------------------------------------------------------------------|---------|------------|---------|------------|-------|-------|
| HM-b-4-TS4                                                                  | 0.13150 | -533.66117 | 0.07558 | -533.71708 |       |       |
| HM-b-4-TS4 - H <sub>2</sub> O                                               | 0.11016 | -457.29649 | 0.07886 | -457.32779 | 285.6 | 346.3 |
| HM-b-4-IM4                                                                  | 0.13868 | -533.75401 | 0.08222 | -533.81047 |       |       |
| HM-b-4-IM4 - H <sub>2</sub> O                                               | 0.11735 | -457.38933 | 0.08550 | -457.42118 | 41.8  | 101.1 |
| HM-b-4-TS5                                                                  | 0.13177 | -533.63787 | 0.07530 | -533.69434 |       |       |
| HM-b-4-TS5 - H <sub>2</sub> O                                               | 0.11044 | -457.27319 | 0.07858 | -457.30504 | 346.7 | 406.0 |
| HM-b-4-IM5                                                                  | 0.13875 | -533.75889 | 0.08132 | -533.81632 |       |       |
| HM-b-4-IM5 - H <sub>2</sub> O                                               | 0.11741 | -457.39420 | 0.08460 | -457.42702 | 29.0  | 85.8  |
| HM-b-4-TS6                                                                  | 0.13340 | -533.68916 | 0.07673 | -533.74582 |       |       |
| HM-b-4-TS6 - H <sub>2</sub> O                                               | 0.11207 | -457.32447 | 0.08001 | -457.35652 | 212.1 | 270.9 |
| HM-b-4-IM6                                                                  | 0.13678 | -533.74566 | 0.07678 | -533.80567 |       |       |
| HM-b-4-IM6 - H <sub>2</sub> O                                               | 0.11545 | -457.38098 | 0.08005 | -457.41637 | 63.7  | 113.7 |
| HM-b-4-TS7                                                                  | 0.19024 | -649.29800 | 0.12228 | -649.36595 |       |       |
| HM-b-4-TS7 - H <sub>2</sub> O - CH <sub>3</sub> OH                          | 0.11752 | -457.34912 | 0.10701 | -457.35963 | 147.4 | 262.7 |
| HM-b-4-IM7                                                                  | 0.13665 | -533.76620 | 0.07628 | -533.82657 |       |       |
| HM-b-4-IM7 - H <sub>2</sub> O                                               | 0.11532 | -457.40151 | 0.07956 | -457.43727 | 9.8   | 58.9  |
| HM-b-4-TS8                                                                  | 0.13163 | -533.68939 | 0.07391 | -533.74711 |       |       |
| HM-b-4-TS8 - H <sub>2</sub> O                                               | 0.11029 | -457.32471 | 0.07719 | -457.35781 | 211.5 | 267.5 |
| HM-b-4-IM8                                                                  | 0.10890 | -457.38647 | 0.05280 | -457.44257 | 49.3  | 45.0  |
| HM-b-4-TS9                                                                  | 0.16024 | -572.92794 | 0.09587 | -572.99231 |       |       |
| HM-b-4-TS9 - CH <sub>3</sub> OH                                             | 0.10885 | -457.34376 | 0.07732 | -457.37529 | 161.5 | 221.6 |
| HM-b-4-IM9                                                                  | 0.16532 | -572.98835 | 0.10129 | -573.05238 |       |       |
| HM-b-4-IM9 - CH <sub>3</sub> OH                                             | 0.11394 | -457.40416 | 0.08274 | -457.43536 | 2.9   | 63.9  |
| HM-b-4-TS10                                                                 | 0.21525 | -688.52338 | 0.14179 | -688.59684 |       |       |
| HM-b-4-TS10 - 2*CH <sub>3</sub> OH                                          | 0.11248 | -457.35501 | 0.10469 | -457.36280 | 131.9 | 254.4 |
| HM-b-4-IM10                                                                 | 0.22098 | -688.57823 | 0.14843 | -688.65078 |       |       |
| HM-b-4-IM10 - 2*CH <sub>3</sub> OH                                          | 0.11821 | -457.40986 | 0.11133 | -457.41674 | -12.1 | 112.8 |
| HM-b-4-TS11                                                                 | 0.21311 | -688.46435 | 0.14073 | -688.53673 |       |       |
| HM-b-4-TS11 - 2*CH <sub>3</sub> OH                                          | 0.11034 | -457.29598 | 0.10363 | -457.30269 | 286.9 | 412.2 |
| HM-b-4-IM11                                                                 | 0.15646 | -459.76143 | 0.09746 | -459.82043 |       |       |
| HM-b-4-IM11 - 2*CH <sub>3</sub> OH + HCOOCH <sub>3</sub>                    | 0.11546 | -457.41219 | 0.08379 | -457.44386 | -18.2 | 41.6  |
| HM-b-4-TS12                                                                 | 0.17871 | -536.06181 | 0.11694 | -536.12358 |       |       |
| HM-b-4-TS12 - 2*CH <sub>3</sub> OH + HCOOCH <sub>3</sub> - H <sub>2</sub> O | 0.11638 | -457.34789 | 0.10655 | -457.35772 | 150.6 | 267.7 |

**Table S11.** Zero-point energies (*ZPE*, hartree), thermal correction to Gibbs free energy (*G*<sub>0</sub>, hartree), total energies (*E*<sub>c</sub>, hartree) corrected by *ZPE*, sum of electronic and thermal free energies (*G*<sub>c</sub>, hartree) with *ZPE* and thermal corrections, and relative energies (*E*<sub>r</sub>, kJ mol<sup>-1</sup>) and relative Gibbs free energies (*G*<sub>r</sub>, kJ mol<sup>-1</sup>) for the dehydration of HMF-1 with methanol to MF and MLev catalyzed by [CH<sub>3</sub>OH<sub>2</sub>]<sup>+</sup> at PBE0/6-311++G (d, p) level in methanol solution.

| Species                                                                                             | <i>ZPE</i> | <i>E</i> <sub>c</sub> | <i>G</i> <sub>0</sub> | <i>G</i> <sub>c</sub> | <i>E</i> <sub>r</sub> | <i>G</i> <sub>r</sub> |
|-----------------------------------------------------------------------------------------------------|------------|-----------------------|-----------------------|-----------------------|-----------------------|-----------------------|
| CH <sub>3</sub> OH                                                                                  | 0.05138    | -115.58419            | 0.01855               | -115.61702            |                       |                       |
| [CH <sub>3</sub> OH <sub>2</sub> ] <sup>+</sup>                                                     | 0.06379    | -115.98600            | 0.03036               | -116.01943            |                       |                       |
| H <sub>2</sub> O                                                                                    | 0.02133    | -76.36469             | -0.00328              | -76.38930             |                       |                       |
| HCOOCH <sub>3</sub>                                                                                 | 0.06177    | -228.81914            | 0.02343               | -228.85748            |                       |                       |
| <i>β</i> -D-fructofuranoses                                                                         | 0.19778    | -686.49060            | 0.13320               | -686.55518            | 0.0                   | 0.0                   |
| HMF-1                                                                                               | 0.11257    | -457.40525            | 0.05813               | -457.45969            |                       |                       |
| HMF-1 + 3*H <sub>2</sub> O                                                                          | 0.17657    | -686.49931            | 0.04829               | -686.62759            | -22.9                 | -190.1                |
| H-IM1                                                                                               | 0.17891    | -573.41110            | 0.11207               | -573.47794            |                       |                       |
| H-IM1 + 3*H <sub>2</sub> O - [CH <sub>3</sub> OH <sub>2</sub> ] <sup>+</sup>                        | 0.17912    | -686.51916            | 0.07187               | -686.62641            | -75.0                 | -187.0                |
| H-IM2                                                                                               | 0.12658    | -457.80507            | 0.07351               | -457.85815            |                       |                       |
| H-IM2 + 3*H <sub>2</sub> O - [CH <sub>3</sub> OH <sub>2</sub> ] <sup>+</sup> + CH <sub>3</sub> OH   | 0.17818    | -686.49732            | 0.05186               | -686.62363            | -17.6                 | -179.7                |
| H-TS1                                                                                               | 0.11921    | -457.78468            | 0.05994               | -457.84396            |                       |                       |
| H-TS1 + 3*H <sub>2</sub> O - [CH <sub>3</sub> OH <sub>2</sub> ] <sup>+</sup> + CH <sub>3</sub> OH   | 0.17081    | -686.47693            | 0.03829               | -686.60945            | 35.9                  | -142.5                |
| H-IM3                                                                                               | 0.09643    | -381.41896            | 0.04795               | -381.46744            |                       |                       |
| H-IM3 + 4*H <sub>2</sub> O - [CH <sub>3</sub> OH <sub>2</sub> ] <sup>+</sup> + CH <sub>3</sub> OH   | 0.16935    | -686.47589            | 0.02302               | -686.62223            | 38.6                  | -176.0                |
| H-TS2                                                                                               | 0.15071    | -496.99847            | 0.09420               | -497.05498            |                       |                       |
| H-TS2 + 4*H <sub>2</sub> O - [CH <sub>3</sub> OH <sub>2</sub> ] <sup>+</sup>                        | 0.17225    | -686.47121            | 0.05072               | -686.59274            | 50.9                  | -98.6                 |
| H-IM4                                                                                               | 0.15130    | -496.99843            | 0.09390               | -497.05582            |                       |                       |
| H-IM4 + 4*H <sub>2</sub> O - [CH <sub>3</sub> OH <sub>2</sub> ] <sup>+</sup>                        | 0.17284    | -686.47117            | 0.05042               | -686.59359            | 51.0                  | -100.9                |
| H-TS3                                                                                               | 0.14804    | -496.99603            | 0.09306               | -497.05101            |                       |                       |
| H-TS3 + 4*H <sub>2</sub> O - [CH <sub>3</sub> OH <sub>2</sub> ] <sup>+</sup>                        | 0.16958    | -686.46878            | 0.04959               | -686.58877            | 57.3                  | -88.2                 |
| H-IM5                                                                                               | 0.15231    | -496.99810            | 0.09634               | -497.05407            |                       |                       |
| H-IM5 + 4*H <sub>2</sub> O - [CH <sub>3</sub> OH <sub>2</sub> ] <sup>+</sup>                        | 0.17385    | -686.47085            | 0.05286               | -686.59184            | 51.9                  | -96.3                 |
| H-TS4                                                                                               | 0.20799    | -612.57889            | 0.14445               | -612.66243            |                       |                       |
| H-TS4 + 4*H <sub>2</sub> O - [CH <sub>3</sub> OH <sub>2</sub> ] <sup>+</sup> - CH <sub>3</sub> OH   | 0.17815    | -686.46745            | 0.08242               | -686.58318            | 60.8                  | -73.5                 |
| H-IM6                                                                                               | 0.20867    | -612.61014            | 0.14438               | -612.67443            |                       |                       |
| H-IM6 + 4*H <sub>2</sub> O - [CH <sub>3</sub> OH <sub>2</sub> ] <sup>+</sup> - CH <sub>3</sub> OH   | 0.17883    | -686.49870            | 0.08235               | -686.59518            | -21.3                 | -105.0                |
| H-TS5                                                                                               | 0.25751    | -728.20449            | 0.18139               | -728.28061            |                       |                       |
| H-TS5 + 4*H <sub>2</sub> O - [CH <sub>3</sub> OH <sub>2</sub> ] <sup>+</sup> - 2*CH <sub>3</sub> OH | 0.17628    | -686.50886            | 0.10081               | -686.58433            | -47.9                 | -76.6                 |
| H-IM7                                                                                               | 0.26212    | -728.21615            | 0.18769               | -728.29058            |                       |                       |
| H-IM7 + 4*H <sub>2</sub> O - [CH <sub>3</sub> OH <sub>2</sub> ] <sup>+</sup> - 2*CH <sub>3</sub> OH | 0.18089    | -686.52053            | 0.10711               | -686.59431            | -78.6                 | -102.7                |
| H-TS6                                                                                               | 0.25707    | -728.20889            | 0.18070               | -728.28526            |                       |                       |
| H-TS6 + 4*H <sub>2</sub> O - [CH <sub>3</sub> OH <sub>2</sub> ] <sup>+</sup> - 2*CH <sub>3</sub> OH | 0.17584    | -686.51327            | 0.10012               | -686.58899            | -59.5                 | -88.8                 |
| H-IM8                                                                                               | 0.20720    | -612.63814            | 0.14125               | -612.70409            |                       |                       |
| H-IM8 + 4*H <sub>2</sub> O - [CH <sub>3</sub> OH <sub>2</sub> ] <sup>+</sup> - CH <sub>3</sub> OH   | 0.17736    | -686.52670            | 0.07922               | -686.62484            | -94.8                 | -182.9                |
| H-TS7                                                                                               | 0.20610    | -612.61840            | 0.14092               | -612.68359            |                       |                       |
| H-TS7 + 4*H <sub>2</sub> O - [CH <sub>3</sub> OH <sub>2</sub> ] <sup>+</sup> - CH <sub>3</sub> OH   | 0.17626    | -686.50696            | 0.07889               | -686.60433            | -43.0                 | -129.1                |
| H-IM9                                                                                               | 0.20639    | -612.63404            | 0.13577               | -612.70466            |                       |                       |
| H-IM9 + 4*H <sub>2</sub> O - [CH <sub>3</sub> OH <sub>2</sub> ] <sup>+</sup> - CH <sub>3</sub> OH   | 0.17654    | -686.52260            | 0.07374               | -686.62541            | -84.0                 | -184.4                |
| H-TS8                                                                                               | 0.20202    | -612.63362            | 0.13431               | -612.70133            |                       |                       |
| H-TS8 + 4*H <sub>2</sub> O - [CH <sub>3</sub> OH <sub>2</sub> ] <sup>+</sup> - CH <sub>3</sub> OH   | 0.17218    | -686.52218            | 0.07228               | -686.62207            | -82.9                 | -175.6                |

## Continued from Table S11

| Species                                                                                                                    | ZPE     | $E_c$       | $G_0$    | $G_c$      | $E_r$  | $G_r$  |
|----------------------------------------------------------------------------------------------------------------------------|---------|-------------|----------|------------|--------|--------|
| H-IM10                                                                                                                     | 0.14264 | -383.83069  | 0.09218  | -383.88115 |        |        |
| H-IM10 + 4*H <sub>2</sub> O - [CH <sub>3</sub> OH <sub>2</sub> ] <sup>+</sup> - CH <sub>3</sub> OH + HCOOCH <sub>3</sub>   | 0.17456 | -686.53839  | 0.05358  | -686.65937 | -125.5 | -273.6 |
| H-TS9                                                                                                                      | 0.22127 | -575.77679  | 0.15146  | -575.84660 |        |        |
| H-TS9 + 3*H <sub>2</sub> O - [CH <sub>3</sub> OH <sub>2</sub> ] <sup>+</sup> - 2*CH <sub>3</sub> OH + HCOOCH <sub>3</sub>  | 0.18048 | -686.53561  | 0.09759  | -686.61851 | -118.2 | -166.3 |
| H-IM11                                                                                                                     | 0.16728 | -460.19133  | 0.10609  | -460.25252 |        |        |
| H-IM11 + 3*H <sub>2</sub> O - [CH <sub>3</sub> OH <sub>2</sub> ] <sup>+</sup> - CH <sub>3</sub> OH + HCOOCH <sub>3</sub>   | 0.17788 | -686.53434  | 0.07077  | -686.64144 | -114.8 | -226.5 |
| H-IM12                                                                                                                     | 0.22350 | -575.78382  | 0.15476  | -575.85256 |        |        |
| H-IM12 + 3*H <sub>2</sub> O - [CH <sub>3</sub> OH <sub>2</sub> ] <sup>+</sup> - 2*CH <sub>3</sub> OH + HCOOCH <sub>3</sub> | 0.18271 | -686.54265  | 0.10089  | -686.62447 | -136.6 | -181.9 |
| H-TS10                                                                                                                     | 0.22108 | -575.77843  | 0.15291  | -575.84660 |        |        |
| H-TS10 + 3*H <sub>2</sub> O - [CH <sub>3</sub> OH <sub>2</sub> ] <sup>+</sup> - 2*CH <sub>3</sub> OH + HCOOCH <sub>3</sub> | 0.18029 | -686.53725  | 0.09904  | -686.61850 | -122.5 | -166.3 |
| H-IM13                                                                                                                     | 0.16920 | -460.20480  | 0.11036  | -460.26363 |        |        |
| H-IM13 + 3*H <sub>2</sub> O - [CH <sub>3</sub> OH <sub>2</sub> ] <sup>+</sup> - CH <sub>3</sub> OH + HCOOCH <sub>3</sub>   | 0.17979 | -686.54781  | 0.07504  | -686.65256 | -150.2 | -255.7 |
| H-TS11                                                                                                                     | 0.21764 | -575.79857  | 0.14711  | -575.86910 |        |        |
| H-TS11 + 3*H <sub>2</sub> O - [CH <sub>3</sub> OH <sub>2</sub> ] <sup>+</sup> - 2*CH <sub>3</sub> OH + HCOOCH <sub>3</sub> | 0.17685 | -686.55739  | 0.09324  | -686.64100 | -175.4 | -225.3 |
| H-IM14                                                                                                                     | 0.16876 | -460.22374  | 0.10849  | -460.28401 |        |        |
| H-IM14 + 3*H <sub>2</sub> O - [CH <sub>3</sub> OH <sub>2</sub> ] <sup>+</sup> - CH <sub>3</sub> OH + HCOOCH <sub>3</sub>   | 0.17935 | -686.56675  | 0.07317  | -686.67293 | -199.9 | -309.2 |
| MLev                                                                                                                       | 0.15586 | -459.81561  | 0.09582  | -459.87564 |        |        |
| MLev - 2*CH <sub>3</sub> OH + HCOOCH <sub>3</sub> +3*H <sub>2</sub> O                                                      | 0.17885 | -686.560434 | 0.072315 | -686.66697 | -183.3 | -293.5 |

**Table S12.** Zero-point energies (*ZPE*, hartree), thermal correction to Gibbs free energy ( $G_0$ , hartree), total energies ( $E_c$ , hartree) corrected by *ZPE*, Sum of electronic and thermal free energies ( $G_c$ , hartree) with *ZPE* and thermal corrections, and relative energies ( $E_r$ , kJ mol<sup>-1</sup>) and relative Gibbs free energies ( $G_r$ , kJ mol<sup>-1</sup>) for the dehydration of MG through –O2H group with methanol to MF and MLev in the absence of catalyst in methanol solution.

| Species                                                                     | ZPE     | $E_c$      | $G_0$    | $G_c$      | $E_r$ | $G_r$  |
|-----------------------------------------------------------------------------|---------|------------|----------|------------|-------|--------|
| CH <sub>3</sub> OH                                                          | 0.05138 | -115.58419 | 0.01855  | -115.61702 |       |        |
| [CH <sub>3</sub> OH <sub>2</sub> ] <sup>+</sup>                             | 0.06379 | -115.98600 | 0.03036  | -116.01943 |       |        |
| H <sub>2</sub> O                                                            | 0.02133 | -76.36469  | -0.00328 | -76.38930  |       |        |
| HCOOCH <sub>3</sub>                                                         | 0.06177 | -228.81914 | 0.02343  | -228.85748 |       |        |
| MG                                                                          | 0.22553 | -725.71623 | 0.15673  | -725.78503 | 0.0   | 0.0    |
| GM-b-2-TS1                                                                  | 0.22087 | -725.59559 | 0.15316  | -725.66330 | 316.8 | 319.6  |
| GM-b-2-IM1                                                                  | 0.19721 | -649.34324 | 0.13312  | -649.40733 |       |        |
| GM-b-2-IM1 + H <sub>2</sub> O                                               | 0.21855 | -725.70792 | 0.12984  | -725.79663 | 21.8  | -30.5  |
| GM-b-2-TS2                                                                  | 0.19338 | -649.20959 | 0.12910  | -649.27386 |       |        |
| GM-b-2-TS2 + H <sub>2</sub> O                                               | 0.21471 | -725.57427 | 0.12582  | -725.66316 | 372.7 | 320.0  |
| GM-b-2-IM2                                                                  | 0.19465 | -649.22510 | 0.12808  | -649.29167 |       |        |
| GM-b-2-IM2 + H <sub>2</sub> O                                               | 0.21599 | -725.58978 | 0.12480  | -725.68096 | 332.0 | 273.2  |
| GM-b-2-TS3                                                                  | 0.19091 | -649.21076 | 0.12544  | -649.27623 |       |        |
| GM-b-2-TS3 + H <sub>2</sub> O                                               | 0.21225 | -725.57544 | 0.12216  | -725.66553 | 369.6 | 313.8  |
| GM-b-2-IM3                                                                  | 0.19724 | -649.34150 | 0.13184  | -649.40690 |       |        |
| GM-b-2-IM3 + H <sub>2</sub> O                                               | 0.21857 | -725.70619 | 0.12856  | -725.79620 | 26.4  | -29.3  |
| GM-b-2-TS4                                                                  | 0.24568 | -764.86020 | 0.16928  | -764.93660 |       |        |
| GM-b-2-TS4 + H <sub>2</sub> O - CH <sub>3</sub> OH                          | 0.21562 | -725.64070 | 0.14745  | -725.70888 | 198.3 | 200.0  |
| GM-b-2-IM4                                                                  | 0.25438 | -764.94605 | 0.18125  | -765.01918 |       |        |
| GM-b-2-IM4 + H <sub>2</sub> O - CH <sub>3</sub> OH                          | 0.22433 | -725.72655 | 0.15942  | -725.79146 | -27.1 | -16.9  |
| GM-b-2-TS5                                                                  | 0.24386 | -764.84560 | 0.16789  | -764.92157 |       |        |
| GM-b-2-TS5 + H <sub>2</sub> O - CH <sub>3</sub> OH                          | 0.21381 | -725.62610 | 0.14606  | -725.69385 | 236.6 | 239.4  |
| GM-b-2-IM5                                                                  | 0.22519 | -688.57946 | 0.15452  | -688.65013 |       |        |
| GM-b-2-IM5 + 2*H <sub>2</sub> O - CH <sub>3</sub> OH                        | 0.21647 | -725.72464 | 0.12941  | -725.81171 | -22.1 | -70.0  |
| GM-b-2-TS6                                                                  | 0.21943 | -688.47603 | 0.14907  | -688.54638 |       |        |
| GM-b-2-TS6 + 2*H <sub>2</sub> O - CH <sub>3</sub> OH                        | 0.21071 | -725.62121 | 0.12396  | -725.70796 | 249.5 | 202.4  |
| GM-b-2-IM6                                                                  | 0.22476 | -688.57822 | 0.15586  | -688.64712 |       |        |
| GM-b-2-IM6 + 2*H <sub>2</sub> O - CH <sub>3</sub> OH                        | 0.21604 | -725.72341 | 0.13075  | -725.80869 | -18.8 | -62.1  |
| GM-b-2-TS7                                                                  | 0.21095 | -688.46663 | 0.15092  | -688.52666 |       |        |
| GM-b-2-TS7 + 2*H <sub>2</sub> O - CH <sub>3</sub> OH                        | 0.20223 | -725.61182 | 0.12581  | -725.68824 | 274.2 | 254.1  |
| GM-b-2-IM7                                                                  | 0.22130 | -688.57764 | 0.14210  | -688.65684 |       |        |
| GM-b-2-IM7 + 2*H <sub>2</sub> O - CH <sub>3</sub> OH                        | 0.21258 | -725.72283 | 0.11699  | -725.81842 | -17.3 | -87.7  |
| GM-b-2-IM8                                                                  | 0.15865 | -459.76004 | 0.10363  | -459.81506 |       |        |
| GM-b-2-IM8 + 2*H <sub>2</sub> O - CH <sub>3</sub> OH + HCOOCH <sub>3</sub>  | 0.21170 | -725.72437 | 0.10195  | -725.83412 | -21.4 | -128.9 |
| GM-b-2-TS8                                                                  | 0.14885 | -459.66497 | 0.09195  | -459.72187 |       |        |
| GM-b-2-TS8 + 2*H <sub>2</sub> O - CH <sub>3</sub> OH + HCOOCH <sub>3</sub>  | 0.20190 | -725.62930 | 0.09028  | -725.74093 | 228.2 | 115.8  |
| GM-b-2-IM9                                                                  | 0.13008 | -383.38968 | 0.07892  | -383.44085 |       |        |
| GM-b-2-IM9 + 3*H <sub>2</sub> O - CH <sub>3</sub> OH + HCOOCH <sub>3</sub>  | 0.20446 | -725.71870 | 0.07396  | -725.84920 | -6.5  | -168.5 |
| GM-b-2-TS9                                                                  | 0.15125 | -459.66747 | 0.09701  | -459.72172 |       |        |
| GM-b-2-TS9 + 2*H <sub>2</sub> O - CH <sub>3</sub> OH + HCOOCH <sub>3</sub>  | 0.20430 | -725.63180 | 0.09533  | -725.74077 | 221.7 | 116.2  |
| GM-b-2-IM10                                                                 | 0.15864 | -459.76009 | 0.10358  | -459.81514 |       |        |
| GM-b-2-IM10 + 2*H <sub>2</sub> O - CH <sub>3</sub> OH + HCOOCH <sub>3</sub> | 0.21168 | -725.72441 | 0.10190  | -725.83420 | -21.5 | -129.1 |
| GM-b-2-TS10                                                                 | 0.15148 | -459.64347 | 0.09596  | -459.69899 |       |        |
| GM-b-2-TS10 + 2*H <sub>2</sub> O - CH <sub>3</sub> OH + HCOOCH <sub>3</sub> | 0.20453 | -725.60779 | 0.09428  | -725.71804 | 284.7 | 175.9  |
| GM-b-2-IM11                                                                 | 0.15841 | -459.76300 | 0.10276  | -459.81865 |       |        |
| GM-b-2-IM11 + 2*H <sub>2</sub> O - CH <sub>3</sub> OH + HCOOCH <sub>3</sub> | 0.21146 | -725.72732 | 0.10108  | -725.83771 | -29.1 | -138.3 |
| GM-b-2-TS11                                                                 | 0.17894 | -536.06896 | 0.11556  | -536.13235 |       |        |
| GM-b-2-TS11 + H <sub>2</sub> O - CH <sub>3</sub> OH + HCOOCH <sub>3</sub>   | 0.21065 | -725.66860 | 0.11716  | -725.76210 | 125.1 | 60.2   |

## Continued from Table S12

| Species                                                                       | ZPE     | $E_c$      | $G_0$   | $G_c$      | $E_r$  | $G_r$  |
|-------------------------------------------------------------------------------|---------|------------|---------|------------|--------|--------|
| HM-b-1-IM9                                                                    | 0.18468 | -536.12704 | 0.12242 | -536.18930 |        |        |
| HM-b-1-IM9 + H <sub>2</sub> O - CH <sub>3</sub> OH + HCOOCH <sub>3</sub>      | 0.21639 | -725.72668 | 0.12402 | -725.81906 | -27.4  | -89.3  |
| HM-b-1-TS9                                                                    | 0.23616 | -651.67085 | 0.16452 | -651.74249 |        |        |
| HM-b-1-TS9 + H <sub>2</sub> O - 2*CH <sub>3</sub> OH + HCOOCH <sub>3</sub>    | 0.21649 | -725.68631 | 0.14757 | -725.75522 | 78.6   | 78.3   |
| HM-b-1-IM10                                                                   | 0.18412 | -536.14594 | 0.12116 | -536.20890 |        |        |
| HM-b-1-IM10 + H <sub>2</sub> O - CH <sub>3</sub> OH + HCOOCH <sub>3</sub>     | 0.21584 | -725.74558 | 0.12276 | -725.83866 | -77.1  | -140.8 |
| HM-b-1-TS10                                                                   | 0.17750 | -536.03112 | 0.11243 | -536.09620 |        |        |
| HM-b-1-TS10 + H <sub>2</sub> O - CH <sub>3</sub> OH + HCOOCH <sub>3</sub>     | 0.20922 | -725.63076 | 0.11403 | -725.72595 | 224.4  | 155.1  |
| HM-b-1-IM11                                                                   | 0.15510 | -459.77067 | 0.09415 | -459.83163 |        |        |
| HM-b-1-IM11 + 2*H <sub>2</sub> O - CH <sub>3</sub> OH + HCOOCH <sub>3</sub>   | 0.20815 | -725.73500 | 0.09247 | -725.85068 | -49.3  | -172.4 |
| HM-b-1-TS11                                                                   | 0.20496 | -575.33764 | 0.13623 | -575.40637 |        |        |
| HM-b-1-TS11 + 2*H <sub>2</sub> O - 2*CH <sub>3</sub> OH + HCOOCH <sub>3</sub> | 0.20663 | -725.71778 | 0.11600 | -725.80841 | -4.0   | -61.4  |
| GM-b-2-TS1a                                                                   | 0.21869 | -725.60350 | 0.15026 | -725.67194 | 296.0  | 296.9  |
| GM-b-2-IM1a                                                                   | 0.19752 | -649.34488 | 0.13353 | -649.40886 |        |        |
| GM-b-2-IM1a + H <sub>2</sub> O                                                | 0.21885 | -725.70956 | 0.13025 | -725.79816 | 17.5   | -34.5  |
| GM-b-2-TS2a                                                                   | 0.19497 | -649.22285 | 0.13217 | -649.28565 |        |        |
| GM-b-2-TS2a + H <sub>2</sub> O                                                | 0.21630 | -725.58754 | 0.12889 | -725.67495 | 337.9  | 289.0  |
| GM-b-2-IM2a                                                                   | 0.19661 | -649.26921 | 0.13325 | -649.33257 |        |        |
| GM-b-2-IM2a + H <sub>2</sub> O                                                | 0.21794 | -725.63390 | 0.12997 | -725.72187 | 216.2  | 165.8  |
| GM-b-2-TS3a                                                                   | 0.19304 | -649.24188 | 0.12803 | -649.30690 |        |        |
| GM-b-2-TS3a + H <sub>2</sub> O                                                | 0.21437 | -725.60657 | 0.12475 | -725.69620 | 287.9  | 233.2  |
| GM-b-2-TS4a                                                                   | 0.21899 | -725.63486 | 0.14681 | -725.70704 | 213.6  | 204.8  |
| GM-b-2-IM4a                                                                   | 0.22646 | -725.72037 | 0.15740 | -725.78943 | -10.8  | -11.5  |
| GM-b-2-TS5a                                                                   | 0.27493 | -841.19658 | 0.19478 | -841.27672 |        |        |
| GM-b-2-TS5a - CH <sub>3</sub> OH                                              | 0.22354 | -725.61240 | 0.17623 | -725.65971 | 272.6  | 329.1  |
| MLev                                                                          | 0.15586 | -459.81561 | 0.09582 | -459.87564 |        |        |
| Mlev + 2*H <sub>2</sub> O - CH <sub>3</sub> OH + HCOOCH <sub>3</sub>          | 0.20890 | -725.77993 | 0.09414 | -725.89469 | -167.2 | -287.9 |

**Table S13.** Zero-point energies (*ZPE*, hartree), thermal correction to Gibbs free energy (*G<sub>0</sub>*, hartree), total energies (*E<sub>c</sub>*, hartree) corrected by *ZPE*, Sum of electronic and thermal free energies (*G<sub>c</sub>*, hartree) with *ZPE* and thermal corrections, and relative energies (*E<sub>r</sub>*, kJ mol<sup>-1</sup>) and relative Gibbs free energies (*G<sub>r</sub>*, kJ mol<sup>-1</sup>) for the dehydration of MG through –O3H group with methanol to MF and MLev in the absence of catalyst in methanol solution.

| Species                                                                    | <i>ZPE</i> | <i>E<sub>c</sub></i> | <i>G<sub>0</sub></i> | <i>G<sub>c</sub></i> | <i>E<sub>r</sub></i> | <i>G<sub>r</sub></i> |
|----------------------------------------------------------------------------|------------|----------------------|----------------------|----------------------|----------------------|----------------------|
| CH <sub>3</sub> OH                                                         | 0.05138    | -115.58419           | 0.01855              | -115.61702           |                      |                      |
| [CH <sub>3</sub> OH <sub>2</sub> ] <sup>+</sup>                            | 0.06379    | -115.98600           | 0.03036              | -116.01943           |                      |                      |
| H <sub>2</sub> O                                                           | 0.02133    | -76.36469            | -0.00328             | -76.38930            |                      |                      |
| HCOOCH <sub>3</sub>                                                        | 0.06177    | -228.81914           | 0.02343              | -228.85748           |                      |                      |
| MG                                                                         | 0.22553    | -725.71623           | 0.15673              | -725.78503           | 0.0                  | 0.0                  |
| GM-b-3-TS1                                                                 | 0.21797    | -725.60402           | 0.14836              | -725.67363           | 294.6                | 292.5                |
| GM-b-3-IM1                                                                 | 0.19688    | -649.34171           | 0.13181              | -649.40677           |                      |                      |
| GM-b-3-IM1 + H <sub>2</sub> O                                              | 0.21821    | -725.70639           | 0.12853              | -725.79607           | 25.8                 | -29.0                |
| GM-b-3-TS2                                                                 | 0.19422    | -649.21530           | 0.13052              | -649.27900           |                      |                      |
| GM-b-3-TS2 + H <sub>2</sub> O                                              | 0.21555    | -725.57999           | 0.12725              | -725.66830           | 357.7                | 306.5                |
| GM-b-3-IM2                                                                 | 0.19706    | -649.32658           | 0.13319              | -649.39045           |                      |                      |
| GM-b-3-IM2 + H <sub>2</sub> O                                              | 0.21839    | -725.69127           | 0.12991              | -725.77975           | 65.6                 | 13.9                 |
| GM-b-3-TS3                                                                 | 0.19210    | -649.22042           | 0.12675              | -649.28578           |                      |                      |
| GM-b-3-TS3 + H <sub>2</sub> O                                              | 0.21344    | -725.58511           | 0.12347              | -725.67508           | 344.3                | 288.7                |
| GM-b-3-IM3                                                                 | 0.19791    | -649.33736           | 0.13221              | -649.40305           |                      |                      |
| GM-b-3-IM3 + H <sub>2</sub> O                                              | 0.21924    | -725.70205           | 0.12894              | -725.79235           | 37.2                 | -19.2                |
| GM-b-3-TS4                                                                 | 0.24624    | -764.85697           | 0.17081              | -764.93240           |                      |                      |
| GM-b-3-TS4 + H <sub>2</sub> O - CH <sub>3</sub> OH                         | 0.21619    | -725.63747           | 0.14898              | -725.70468           | 206.8                | 211.0                |
| GM-b-3-IM4                                                                 | 0.25389    | -764.94428           | 0.18057              | -765.01760           |                      |                      |
| GM-b-3-IM4 + H <sub>2</sub> O - CH <sub>3</sub> OH                         | 0.22384    | -725.72478           | 0.15874              | -725.78988           | -22.4                | -12.7                |
| GM-b-3-TS5                                                                 | 0.24499    | -764.76669           | 0.16868              | -764.84299           |                      |                      |
| GM-b-3-TS5 + H <sub>2</sub> O - CH <sub>3</sub> OH                         | 0.21494    | -725.54719           | 0.14685              | -725.61527           | 443.8                | 445.7                |
| GM-b-3-IM5                                                                 | 0.25083    | -764.95236           | 0.17533              | -765.02786           |                      |                      |
| GM-b-3-IM5 + H <sub>2</sub> O - CH <sub>3</sub> OH                         | 0.22077    | -725.73286           | 0.15350              | -725.80014           | -43.7                | -39.7                |
| GM-b-3-IM6                                                                 | 0.18814    | -536.13047           | 0.12962              | -536.18899           |                      |                      |
| GM-b-3-IM6 + H <sub>2</sub> O - CH <sub>3</sub> OH + HCOOCH <sub>3</sub>   | 0.21986    | -725.73011           | 0.13122              | -725.81875           | -36.4                | -88.5                |
| GM-b-3-TS6                                                                 | 0.17828    | -536.02876           | 0.11640              | -536.09063           |                      |                      |
| GM-b-3-TS6 + H <sub>2</sub> O - CH <sub>3</sub> OH + HCOOCH <sub>3</sub>   | 0.20999    | -725.62840           | 0.11800              | -725.72039           | 230.6                | 169.7                |
| GM-b-3-IM7                                                                 | 0.15918    | -459.75323           | 0.10333              | -459.80908           |                      |                      |
| GM-b-3-IM7 + 2*H <sub>2</sub> O - CH <sub>3</sub> OH + HCOOCH <sub>3</sub> | 0.21222    | -725.71756           | 0.10165              | -725.82813           | -3.5                 | -113.1               |
| GM-b-3-TS7                                                                 | 0.18013    | -536.03199           | 0.12131              | -536.09081           |                      |                      |
| GM-b-3-TS7 + H <sub>2</sub> O - CH <sub>3</sub> OH + HCOOCH <sub>3</sub>   | 0.21185    | -725.63163           | 0.12291              | -725.72056           | 222.1                | 169.3                |
| GM-b-3-IM8                                                                 | 0.18748    | -536.13008           | 0.12682              | -536.19074           |                      |                      |
| GM-b-3-IM8 + H <sub>2</sub> O - CH <sub>3</sub> OH + HCOOCH <sub>3</sub>   | 0.21920    | -725.72972           | 0.12842              | -725.82050           | -35.4                | -93.1                |
| GM-b-3-TS8                                                                 | 0.18048    | -536.02287           | 0.12045              | -536.08290           |                      |                      |
| GM-b-3-TS8 + H <sub>2</sub> O - CH <sub>3</sub> OH + HCOOCH <sub>3</sub>   | 0.21220    | -725.62251           | 0.12205              | -725.71266           | 246.1                | 190.0                |
| GM-b-3-IM9                                                                 | 0.15920    | -459.75835           | 0.10364              | -459.81391           |                      |                      |
| GM-b-3-IM9 + 2*H <sub>2</sub> O - CH <sub>3</sub> OH + HCOOCH <sub>3</sub> | 0.21224    | -725.72268           | 0.10196              | -725.83296           | -16.9                | -125.8               |
| GM-b-3-TS9                                                                 | 0.15310    | -459.65920           | 0.09695              | -459.71534           |                      |                      |
| GM-b-3-TS9 + 2*H <sub>2</sub> O - CH <sub>3</sub> OH + HCOOCH <sub>3</sub> | 0.20615    | -725.62352           | 0.09528              | -725.73440           | 243.4                | 132.9                |
| GM-b-3-TS1a                                                                | 0.21839    | -725.60306           | 0.14816              | -725.67328           | 297.1                | 293.4                |
| GM-b-3-IM1a                                                                | 0.19714    | -649.34479           | 0.13279              | -649.40914           |                      |                      |
| GM-b-3-IM1a + H <sub>2</sub> O                                             | 0.21847    | -725.70947           | 0.12952              | -725.79843           | 17.7                 | -35.2                |
| GM-b-3-TS2a                                                                | 0.19477    | -649.21654           | 0.13113              | -649.28018           |                      |                      |
| GM-b-3-TS2a + H <sub>2</sub> O                                             | 0.21610    | -725.58123           | 0.12785              | -725.66947           | 354.5                | 303.4                |
| GM-b-3-IM2a                                                                | 0.19578    | -649.26647           | 0.12746              | -649.33478           |                      |                      |
| GM-b-3-IM2a + H <sub>2</sub> O                                             | 0.21711    | -725.63115           | 0.12418              | -725.72408           | 223.4                | 160.0                |
| GM-b-3-TS3a                                                                | 0.19207    | -649.23940           | 0.12763              | -649.30384           |                      |                      |
| GM-b-3-TS3a + H <sub>2</sub> O                                             | 0.21340    | -725.60408           | 0.12435              | -725.69314           | 294.5                | 241.3                |



**Table S14.** Zero-point energies (*ZPE*, hartree), thermal correction to Gibbs free energy (*G*<sub>0</sub>, hartree), total energies (*E*<sub>c</sub>, hartree) corrected by *ZPE*, Sum of electronic and thermal free energies (*G*<sub>c</sub>, hartree) with *ZPE* and thermal corrections, and relative energies (*E*<sub>r</sub>, kJ mol<sup>-1</sup>) and relative Gibbs free energies (*G*<sub>r</sub>, kJ mol<sup>-1</sup>) for the dehydration of MG through –O4H group with methanol to MF and MLev in the absence of catalyst in methanol solution.

| Species                                                                      | <i>ZPE</i> | <i>E</i> <sub>c</sub> | <i>G</i> <sub>0</sub> | <i>G</i> <sub>c</sub> | <i>E</i> <sub>r</sub> | <i>G</i> <sub>r</sub> |
|------------------------------------------------------------------------------|------------|-----------------------|-----------------------|-----------------------|-----------------------|-----------------------|
| CH <sub>3</sub> OH                                                           | 0.05138    | -115.58419            | 0.01855               | -115.61702            |                       |                       |
| [CH <sub>3</sub> OH <sub>2</sub> ] <sup>+</sup>                              | 0.06379    | -115.98600            | 0.03036               | -116.01943            |                       |                       |
| H <sub>2</sub> O                                                             | 0.02133    | -76.36469             | -0.00328              | -76.38930             |                       |                       |
| HCOOCH <sub>3</sub>                                                          | 0.06177    | -228.81914            | 0.02343               | -228.85748            |                       |                       |
| MG                                                                           | 0.22553    | -725.71623            | 0.15673               | -725.78503            | 0.0                   | 0.0                   |
| GM-b-4-TS1                                                                   | 0.21819    | -725.60490            | 0.14963               | -725.67346            | 292.3                 | 292.9                 |
| GM-b-4-IM1                                                                   | 0.19765    | -649.34314            | 0.13342               | -649.40737            |                       |                       |
| GM-b-4-IM1 + H <sub>2</sub> O                                                | 0.21899    | -725.70783            | 0.13015               | -725.79667            | 22.1                  | -30.5                 |
| GM-b-4-TS2                                                                   | 0.19355    | -649.28208            | 0.12929               | -649.34633            |                       |                       |
| GM-b-4-TS2 + H <sub>2</sub> O                                                | 0.21488    | -725.64676            | 0.12602               | -725.73563            | 182.4                 | 129.7                 |
| GM-b-4-IM2                                                                   | 0.12853    | -420.50848            | 0.07407               | -420.56294            |                       |                       |
| GM-b-4-IM2 + H <sub>2</sub> O + HCOOCH <sub>3</sub>                          | 0.21162    | -725.69231            | 0.09422               | -725.80971            | 62.8                  | -64.8                 |
| GM-b-4-TS3                                                                   | 0.17739    | -536.01831            | 0.11149               | -536.08420            |                       |                       |
| GM-b-4-TS3 + H <sub>2</sub> O + HCOOCH <sub>3</sub> - CH <sub>3</sub> OH     | 0.20910    | -725.61795            | 0.11309               | -725.71396            | 258.0                 | 186.6                 |
| GM-b-4-IM3                                                                   | 0.18497    | -536.11227            | 0.12135               | -536.17589            |                       |                       |
| GM-b-4-IM3 + H <sub>2</sub> O + HCOOCH <sub>3</sub> - CH <sub>3</sub> OH     | 0.21668    | -725.71191            | 0.12295               | -725.80564            | 11.4                  | -54.1                 |
| GM-b-4-TS4                                                                   | 0.17957    | -535.99442            | 0.11573               | -536.05825            |                       |                       |
| GM-b-4-TS4 + H <sub>2</sub> O + HCOOCH <sub>3</sub> - CH <sub>3</sub> OH     | 0.21128    | -725.59406            | 0.11733               | -725.68801            | 320.8                 | 254.7                 |
| GM-b-4-IM4                                                                   | 0.20977    | -575.33331            | 0.13577               | -575.40730            |                       |                       |
| GM-b-4-IM4 + 2*H <sub>2</sub> O + HCOOCH <sub>3</sub> - 2*CH <sub>3</sub> OH | 0.21143    | -725.71345            | 0.11554               | -725.80934            | 7.3                   | -63.8                 |
| GM-b-4-TS5                                                                   | 0.20834    | -575.31289            | 0.14059               | -575.38063            |                       |                       |
| GM-b-4-TS5 + 2*H <sub>2</sub> O + HCOOCH <sub>3</sub> - 2*CH <sub>3</sub> OH | 0.21000    | -725.69303            | 0.12036               | -725.78267            | 60.9                  | 6.2                   |
| GM-b-4-IM5                                                                   | 0.21033    | -575.36883            | 0.13707               | -575.44209            |                       |                       |
| GM-b-4-IM5 + 2*H <sub>2</sub> O + HCOOCH <sub>3</sub> - 2*CH <sub>3</sub> OH | 0.21199    | -725.74897            | 0.11684               | -725.84413            | -86.0                 | -155.1                |
| GM-b-4-TS6                                                                   | 0.17619    | -536.06398            | 0.11231               | -536.12786            |                       |                       |
| GM-b-4-TS6 + H <sub>2</sub> O + HCOOCH <sub>3</sub> - CH <sub>3</sub> OH     | 0.20791    | -725.66362            | 0.11391               | -725.75761            | 138.1                 | 72.0                  |
| GM-b-4-IM6                                                                   | 0.18516    | -536.16144            | 0.12097               | -536.22562            |                       |                       |
| GM-b-4-IM6 + H <sub>2</sub> O + HCOOCH <sub>3</sub> - CH <sub>3</sub> OH     | 0.21687    | -725.76108            | 0.12257               | -725.85538            | -117.7                | -184.7                |
| GM-b-4-TS7                                                                   | 0.17571    | -536.05432            | 0.11054               | -536.11949            |                       |                       |
| GM-b-4-TS7 + H <sub>2</sub> O + HCOOCH <sub>3</sub> - CH <sub>3</sub> OH     | 0.20742    | -725.65396            | 0.11214               | -725.74925            | 163.5                 | 94.0                  |
| GM-b-4-IM7                                                                   | 0.21015    | -575.38254            | 0.13518               | -575.45751            |                       |                       |
| GM-b-4-IM7 + 2*H <sub>2</sub> O + HCOOCH <sub>3</sub> - 2*CH <sub>3</sub> OH | 0.21181    | -725.76268            | 0.11495               | -725.85954            | -121.9                | -195.6                |
| GM-b-4-TS8                                                                   | 0.20575    | -575.34308            | 0.13587               | -575.41296            |                       |                       |
| GM-b-4-TS8 + 2*H <sub>2</sub> O + HCOOCH <sub>3</sub> - 2*CH <sub>3</sub> OH | 0.20741    | -725.72322            | 0.11564               | -725.81499            | -18.3                 | -78.7                 |
| MLev                                                                         | 0.15586    | -459.81561            | 0.09582               | -459.87564            |                       |                       |
| Mlev + 2*H <sub>2</sub> O - CH <sub>3</sub> OH + HCOOCH <sub>3</sub>         | 0.20890    | -725.77993            | 0.09414               | -725.89469            | -167.2                | -287.9                |

**Table S15.** Zero-point energies (*ZPE*, hartree), thermal correction to Gibbs free energy (*G*<sub>0</sub>, hartree), total energies (*E*<sub>c</sub>, hartree) corrected by *ZPE*, Sum of electronic and thermal free energies (*G*<sub>c</sub>, hartree) with *ZPE* and thermal corrections, and relative energies (*E*<sub>r</sub>, kJ mol<sup>-1</sup>) and relative Gibbs free energies (*G*<sub>r</sub>, kJ mol<sup>-1</sup>) for the dehydration of MG through –O2H protonated with methanol to MF and MLev catalyzed by [CH<sub>3</sub>OH<sub>2</sub>]<sup>+</sup> in methanol solution.

| Species                                                                                                                  | <i>ZPE</i> | <i>E</i> <sub>c</sub> | <i>G</i> <sub>0</sub> | <i>G</i> <sub>c</sub> | <i>E</i> <sub>r</sub> | <i>G</i> <sub>r</sub> |
|--------------------------------------------------------------------------------------------------------------------------|------------|-----------------------|-----------------------|-----------------------|-----------------------|-----------------------|
| CH <sub>3</sub> OH                                                                                                       | 0.05138    | -115.58419            | 0.01855               | -115.61702            |                       |                       |
| [CH <sub>3</sub> OH <sub>2</sub> ] <sup>+</sup>                                                                          | 0.06379    | -115.98600            | 0.03036               | -116.01943            |                       |                       |
| H <sub>2</sub> O                                                                                                         | 0.02133    | -76.36469             | -0.00328              | -76.38930             |                       |                       |
| HCOOCH <sub>3</sub>                                                                                                      | 0.06177    | -228.81914            | 0.02343               | -228.85748            |                       |                       |
| MG                                                                                                                       | 0.22553    | -725.71623            | 0.15673               | -725.78503            | 0.0                   | 0.0                   |
| G2-IM1                                                                                                                   | 0.23841    | -726.11572            | 0.16858               | -726.18555            |                       |                       |
| G2-IM1 - [CH <sub>3</sub> OH <sub>2</sub> ] <sup>+</sup> + CH <sub>3</sub> OH                                            | 0.22600    | -725.71391            | 0.15677               | -725.78314            | 6.1                   | 5.0                   |
| G2-TS1                                                                                                                   | 0.23288    | -726.07299            | 0.16104               | -726.14484            |                       |                       |
| G2-TS1 - [CH <sub>3</sub> OH <sub>2</sub> ] <sup>+</sup> + CH <sub>3</sub> OH                                            | 0.22048    | -725.67118            | 0.14923               | -725.74243            | 118.3                 | 111.9                 |
| G2-IM2                                                                                                                   | 0.21066    | -649.74458            | 0.14403               | -649.81121            |                       |                       |
| G2-IM2 - [CH <sub>3</sub> OH <sub>2</sub> ] <sup>+</sup> + CH <sub>3</sub> OH + H <sub>2</sub> O                         | 0.21959    | -725.70745            | 0.12894               | -725.79810            | 23.1                  | -34.3                 |
| G2-TS2                                                                                                                   | 0.26548    | -765.32989            | 0.19257               | -765.40280            |                       |                       |
| G2-TS2 - [CH <sub>3</sub> OH <sub>2</sub> ] <sup>+</sup> + H <sub>2</sub> O                                              | 0.22302    | -725.70857            | 0.15893               | -725.77267            | 20.1                  | 32.5                  |
| G2-IM3                                                                                                                   | 0.26681    | -765.35228            | 0.19314               | -765.42595            |                       |                       |
| G2-IM3 - [CH <sub>3</sub> OH <sub>2</sub> ] <sup>+</sup> + H <sub>2</sub> O                                              | 0.22436    | -725.73096            | 0.15950               | -725.79582            | -38.7                 | -28.3                 |
| G2-TS3                                                                                                                   | 0.26388    | -765.35372            | 0.19307               | -765.42453            |                       |                       |
| G2-TS3 - [CH <sub>3</sub> OH <sub>2</sub> ] <sup>+</sup> + H <sub>2</sub> O                                              | 0.22143    | -725.73240            | 0.15943               | -725.79440            | -42.4                 | -24.6                 |
| G2-IM4                                                                                                                   | 0.26639    | -765.35172            | 0.19302               | -765.42510            |                       |                       |
| G2-IM4 - [CH <sub>3</sub> OH <sub>2</sub> ] <sup>+</sup> + H <sub>2</sub> O                                              | 0.22394    | -725.73041            | 0.15938               | -725.79497            | -37.2                 | -26.1                 |
| G2-TS4                                                                                                                   | 0.25821    | -765.31109            | 0.17869               | -765.39061            |                       |                       |
| G2-TS4 - [CH <sub>3</sub> OH <sub>2</sub> ] <sup>+</sup> + H <sub>2</sub> O                                              | 0.21575    | -725.68977            | 0.14505               | -725.76048            | 69.5                  | 64.5                  |
| G2-IM5                                                                                                                   | 0.23471    | -688.94039            | 0.16447               | -689.01063            |                       |                       |
| G2-IM5 - [CH <sub>3</sub> OH <sub>2</sub> ] <sup>+</sup> + 2*H <sub>2</sub> O                                            | 0.21358    | -725.68376            | 0.12755               | -725.76980            | 85.3                  | 40.0                  |
| G2-TS5                                                                                                                   | 0.23445    | -688.93893            | 0.16462               | -689.00875            |                       |                       |
| G2-TS5 - [CH <sub>3</sub> OH <sub>2</sub> ] <sup>+</sup> + 2*H <sub>2</sub> O                                            | 0.21332    | -725.68230            | 0.12770               | -725.76792            | 89.1                  | 44.9                  |
| G2-IM6                                                                                                                   | 0.23376    | -688.99208            | 0.15680               | -689.06904            |                       |                       |
| G2-IM6 - [CH <sub>3</sub> OH <sub>2</sub> ] <sup>+</sup> + 2*H <sub>2</sub> O                                            | 0.21264    | -725.73546            | 0.11988               | -725.82821            | -50.5                 | -113.4                |
| G2-IM7                                                                                                                   | 0.17321    | -460.15575            | 0.11775               | -460.21121            |                       |                       |
| G2-IM7 - [CH <sub>3</sub> OH <sub>2</sub> ] <sup>+</sup> + 2*H <sub>2</sub> O + HCOOCH <sub>3</sub>                      | 0.21385    | -725.71826            | 0.10426               | -725.82786            | -5.3                  | -112.4                |
| G2-TS6                                                                                                                   | 0.21990    | -575.70460            | 0.14883               | -575.77567            |                       |                       |
| G2-TS6 - [CH <sub>3</sub> OH <sub>2</sub> ] <sup>+</sup> + 2*H <sub>2</sub> O + HCOOCH <sub>3</sub> - CH <sub>3</sub> OH | 0.20916    | -725.68292            | 0.11679               | -725.77529            | 87.5                  | 25.6                  |
| G2-IM8                                                                                                                   | 0.14363    | -383.75767            | 0.09364               | -383.80766            |                       |                       |
| G2-IM8 - [CH <sub>3</sub> OH <sub>2</sub> ] <sup>+</sup> + 3*H <sub>2</sub> O + HCOOCH <sub>3</sub>                      | 0.20560    | -725.68487            | 0.07687               | -725.81360            | 82.3                  | -75.0                 |
| G2-TS7                                                                                                                   | 0.19140    | -499.33362            | 0.13306               | -499.39196            |                       |                       |
| G2-TS7 - [CH <sub>3</sub> OH <sub>2</sub> ] <sup>+</sup> + 3*H <sub>2</sub> O + HCOOCH <sub>3</sub> - CH <sub>3</sub> OH | 0.20200    | -725.67663            | 0.09774               | -725.78089            | 104.0                 | 10.9                  |
| G2-IM9                                                                                                                   | 0.19658    | -499.38987            | 0.13215               | -499.45430            |                       |                       |
| G2-IM9 - [CH <sub>3</sub> OH <sub>2</sub> ] <sup>+</sup> + 3*H <sub>2</sub> O + HCOOCH <sub>3</sub> - CH <sub>3</sub> OH | 0.20717    | -725.73289            | 0.09683               | -725.84322            | -43.7                 | -152.8                |
| G2-TS8                                                                                                                   | 0.19183    | -499.38919            | 0.12818               | -499.45285            |                       |                       |
| G2-TS8 - [CH <sub>3</sub> OH <sub>2</sub> ] <sup>+</sup> + 3*H <sub>2</sub> O + HCOOCH <sub>3</sub> - CH <sub>3</sub> OH | 0.20243    | -725.73220            | 0.09286               | -725.84178            | -41.9                 | -149.0                |
| G2-IM10                                                                                                                  | 0.14235    | -383.81956            | 0.09075               | -383.87116            |                       |                       |
| G2-IM10 - [CH <sub>3</sub> OH <sub>2</sub> ] <sup>+</sup> + 3*H <sub>2</sub> O + HCOOCH <sub>3</sub>                     | 0.20433    | -725.74676            | 0.07398               | -725.87711            | -80.1                 | -241.7                |
| G2-TS9                                                                                                                   | 0.13899    | -383.78699            | 0.08816               | -383.83781            |                       |                       |
| G2-TS9 - [CH <sub>3</sub> OH <sub>2</sub> ] <sup>+</sup> + 3*H <sub>2</sub> O + HCOOCH <sub>3</sub>                      | 0.20096    | -725.71419            | 0.07139               | -725.84376            | 5.4                   | -154.2                |
| G2-IM11                                                                                                                  | 0.14227    | -383.83262            | 0.09103               | -383.88386            |                       |                       |
| G2-IM11 - [CH <sub>3</sub> OH <sub>2</sub> ] <sup>+</sup> + 3*H <sub>2</sub> O + HCOOCH <sub>3</sub>                     | 0.20424    | -725.75982            | 0.07426               | -725.88981            | -114.4                | -275.1                |

## Continued from Table S15

| Species                                                                                                 | ZPE     | $E_c$      | $G_0$   | $G_c$      | $E_r$  | $G_r$  |
|---------------------------------------------------------------------------------------------------------|---------|------------|---------|------------|--------|--------|
| G2-IM12                                                                                                 | 0.21976 | -575.78501 | 0.14431 | -575.86046 |        |        |
| G2-IM12 - $[\text{CH}_3\text{OH}_2]^+ + 2^*\text{H}_2\text{O} + \text{HCOOCH}_3 - \text{CH}_3\text{OH}$ | 0.20902 | -725.76333 | 0.11227 | -725.86008 | -123.7 | -197.0 |
| G2-TS10                                                                                                 | 0.22127 | -575.77679 | 0.15146 | -575.84660 |        |        |
| G2-TS10 - $[\text{CH}_3\text{OH}_2]^+ + 2^*\text{H}_2\text{O} + \text{HCOOCH}_3 - \text{CH}_3\text{OH}$ | 0.21053 | -725.75511 | 0.11942 | -725.84623 | -102.1 | -160.7 |
| G2-IM13                                                                                                 | 0.22363 | -575.78326 | 0.15616 | -575.85073 |        |        |
| G2-IM13 - $[\text{CH}_3\text{OH}_2]^+ + 2^*\text{H}_2\text{O} + \text{HCOOCH}_3 - \text{CH}_3\text{OH}$ | 0.21289 | -725.76159 | 0.12412 | -725.85036 | -119.1 | -171.5 |
| H-TS10                                                                                                  | 0.22108 | -575.77843 | 0.15291 | -575.84660 |        |        |
| H-TS10 - $[\text{CH}_3\text{OH}_2]^+ + 2^*\text{H}_2\text{O} + \text{HCOOCH}_3 - \text{CH}_3\text{OH}$  | 0.21034 | -725.75675 | 0.12087 | -725.84622 | -106.4 | -160.6 |
| H-IM13                                                                                                  | 0.16920 | -460.20480 | 0.11036 | -460.26363 |        |        |
| H-IM13 - $[\text{CH}_3\text{OH}_2]^+ + 2^*\text{H}_2\text{O} + \text{HCOOCH}_3$                         | 0.20984 | -725.76731 | 0.09687 | -725.88028 | -134.1 | -250.1 |
| H-TS11                                                                                                  | 0.21764 | -575.79857 | 0.14711 | -575.86910 |        |        |
| H-TS11 - $[\text{CH}_3\text{OH}_2]^+ + 2^*\text{H}_2\text{O} + \text{HCOOCH}_3 - \text{CH}_3\text{OH}$  | 0.20690 | -725.77689 | 0.11507 | -725.86872 | -159.3 | -219.7 |
| H-IM14                                                                                                  | 0.16876 | -460.22374 | 0.10849 | -460.28401 |        |        |
| H-IM14 - $[\text{CH}_3\text{OH}_2]^+ + 2^*\text{H}_2\text{O} + \text{HCOOCH}_3$                         | 0.20940 | -725.78625 | 0.09500 | -725.90065 | -183.8 | -303.6 |
| MLev                                                                                                    | 0.15586 | -459.81561 | 0.09582 | -459.87564 |        |        |
| MLev + $2^*\text{H}_2\text{O} - \text{CH}_3\text{OH} + \text{HCOOCH}_3$                                 | 0.20890 | -725.77993 | 0.09414 | -725.89469 | -167.2 | -287.9 |

**Table S16.** Zero-point energies (*ZPE*, hartree), thermal correction to Gibbs free energy ( $G_0$ , hartree), total energies ( $E_c$ , hartree) corrected by *ZPE*, Sum of electronic and thermal free energies ( $G_c$ , hartree) with *ZPE* and thermal corrections, and relative energies ( $E_r$ , kJ mol<sup>-1</sup>) and relative Gibbs free energies ( $G_r$ , kJ mol<sup>-1</sup>) for the dehydration of MG through -O3H protonated with methanol to MF and MLev catalyzed by [CH<sub>3</sub>OH<sub>2</sub>]<sup>+</sup> in methanol solution.

| Species                                                                                          | <i>ZPE</i> | $E_c$      | $G_0$    | $G_c$      | $E_r$ | $G_r$ |
|--------------------------------------------------------------------------------------------------|------------|------------|----------|------------|-------|-------|
| CH <sub>3</sub> OH                                                                               | 0.05138    | -115.58419 | 0.01855  | -115.61702 |       |       |
| [CH <sub>3</sub> OH <sub>2</sub> ] <sup>+</sup>                                                  | 0.06379    | -115.98600 | 0.03036  | -116.01943 |       |       |
| H <sub>2</sub> O                                                                                 | 0.02133    | -76.36469  | -0.00328 | -76.38930  |       |       |
| HCOOCH <sub>3</sub>                                                                              | 0.06177    | -228.81914 | 0.02343  | -228.85748 |       |       |
| MG                                                                                               | 0.22553    | -725.71623 | 0.15673  | -725.78503 | 0.0   | 0.0   |
| G3-IM1                                                                                           | 0.23904    | -726.11574 | 0.16998  | -726.18480 |       |       |
| G3-IM1 - [CH <sub>3</sub> OH <sub>2</sub> ] <sup>+</sup> + CH <sub>3</sub> OH                    | 0.22664    | -725.71392 | 0.15816  | -725.78239 | 6.1   | 6.9   |
| G3-TS1                                                                                           | 0.23176    | -726.07902 | 0.15698  | -726.15380 |       |       |
| G3-TS1 - [CH <sub>3</sub> OH <sub>2</sub> ] <sup>+</sup> + CH <sub>3</sub> OH                    | 0.21936    | -725.67720 | 0.14516  | -725.75139 | 102.5 | 88.3  |
| G3-IM2                                                                                           | 0.21075    | -649.73968 | 0.14404  | -649.80639 |       |       |
| G3-IM2 - [CH <sub>3</sub> OH <sub>2</sub> ] <sup>+</sup> + CH <sub>3</sub> OH + H <sub>2</sub> O | 0.21968    | -725.70255 | 0.12894  | -725.79328 | 35.9  | -21.7 |
| G3-TS2                                                                                           | 0.26665    | -765.34326 | 0.19568  | -765.41423 |       |       |
| G3-TS2 - [CH <sub>3</sub> OH <sub>2</sub> ] <sup>+</sup> + H <sub>2</sub> O                      | 0.22420    | -725.72195 | 0.16204  | -725.78410 | -15.0 | 2.4   |
| G3-IM3                                                                                           | 0.26722    | -765.34992 | 0.19373  | -765.42342 |       |       |
| G3-IM3 - [CH <sub>3</sub> OH <sub>2</sub> ] <sup>+</sup> + H <sub>2</sub> O                      | 0.22477    | -725.72861 | 0.16008  | -725.79329 | -32.5 | -21.7 |
| G3-TS3                                                                                           | 0.26382    | -765.34959 | 0.19255  | -765.42087 |       |       |
| G3-TS3 - [CH <sub>3</sub> OH <sub>2</sub> ] <sup>+</sup> + H <sub>2</sub> O                      | 0.22137    | -725.72828 | 0.15891  | -725.79074 | -31.6 | -15.0 |
| G3-IM4                                                                                           | 0.26713    | -765.35006 | 0.19504  | -765.42214 |       |       |
| G3-IM4 - [CH <sub>3</sub> OH <sub>2</sub> ] <sup>+</sup> + H <sub>2</sub> O                      | 0.22467    | -725.72874 | 0.16140  | -725.79201 | -32.8 | -18.3 |
| G3-TS4                                                                                           | 0.25847    | -765.29659 | 0.18142  | -765.37364 |       |       |
| G3-TS4 - [CH <sub>3</sub> OH <sub>2</sub> ] <sup>+</sup> + H <sub>2</sub> O                      | 0.21601    | -725.67527 | 0.14777  | -725.74351 | 107.5 | 109.0 |
| G3-IM5                                                                                           | 0.23575    | -688.95353 | 0.16537  | -689.02391 |       |       |
| G3-IM5 - [CH <sub>3</sub> OH <sub>2</sub> ] <sup>+</sup> + 2*H <sub>2</sub> O                    | 0.21463    | -725.69690 | 0.12845  | -725.78308 | 50.8  | 5.1   |
| G3-TS5                                                                                           | 0.23611    | -688.93196 | 0.16716  | -689.00091 |       |       |
| G3-TS5 - [CH <sub>3</sub> OH <sub>2</sub> ] <sup>+</sup> + 2*H <sub>2</sub> O                    | 0.21498    | -725.67533 | 0.13024  | -725.76008 | 107.4 | 65.5  |

**Table S17.** Zero-point energies (*ZPE*, hartree), thermal correction to Gibbs free energy (*G*<sub>0</sub>, hartree), total energies (*E*<sub>c</sub>, hartree) corrected by *ZPE*, Sum of electronic and thermal free energies (*G*<sub>c</sub>, hartree) with *ZPE* and thermal corrections, and relative energies (*E*<sub>r</sub>, kJ mol<sup>-1</sup>) and relative Gibbs free energies (*G*<sub>r</sub>, kJ mol<sup>-1</sup>) for the dehydration of MG through –O4H protonated with methanol to MF and MLev catalyzed by [CH<sub>3</sub>OH<sub>2</sub>]<sup>+</sup> in methanol solution.

| Species                                                                                                                   | <i>ZPE</i> | <i>E</i> <sub>c</sub> | <i>G</i> <sub>0</sub> | <i>G</i> <sub>c</sub> | <i>E</i> <sub>r</sub> | <i>G</i> <sub>r</sub> |
|---------------------------------------------------------------------------------------------------------------------------|------------|-----------------------|-----------------------|-----------------------|-----------------------|-----------------------|
| CH <sub>3</sub> OH                                                                                                        | 0.05138    | -115.58419            | 0.01855               | -115.61702            |                       |                       |
| [CH <sub>3</sub> OH <sub>2</sub> ] <sup>+</sup>                                                                           | 0.06379    | -115.98600            | 0.03036               | -116.01943            |                       |                       |
| H <sub>2</sub> O                                                                                                          | 0.02133    | -76.36469             | -0.00328              | -76.38930             |                       |                       |
| HCOOCH <sub>3</sub>                                                                                                       | 0.06177    | -228.81914            | 0.02343               | -228.85748            |                       |                       |
| MG                                                                                                                        | 0.22553    | -725.71623            | 0.15673               | -725.78503            | 0.0                   | 0.0                   |
| G4-IM1                                                                                                                    | 0.23902    | -726.11474            | 0.16957               | -726.18418            |                       |                       |
| G4-IM1 + CH <sub>3</sub> OH - [CH <sub>3</sub> OH <sub>2</sub> ] <sup>+</sup>                                             | 0.22662    | -725.71292            | 0.15776               | -725.78177            | 8.7                   | 8.6                   |
| G4-TS1                                                                                                                    | 0.23024    | -726.07199            | 0.15590               | -726.14632            |                       |                       |
| G4-TS1 + CH <sub>3</sub> OH - [CH <sub>3</sub> OH <sub>2</sub> ] <sup>+</sup>                                             | 0.21783    | -725.67017            | 0.14409               | -725.74391            | 120.9                 | 108.0                 |
| G4-IM2                                                                                                                    | 0.21043    | -649.76945            | 0.14604               | -649.83384            |                       |                       |
| G4-IM2 + CH <sub>3</sub> OH - [CH <sub>3</sub> OH <sub>2</sub> ] <sup>+</sup> + H <sub>2</sub> O                          | 0.21936    | -725.73232            | 0.13095               | -725.82073            | -42.2                 | -93.7                 |
| G4-TS2                                                                                                                    | 0.25927    | -765.33698            | 0.18357               | -765.41269            |                       |                       |
| G4-TS2 - [CH <sub>3</sub> OH <sub>2</sub> ] <sup>+</sup> + H <sub>2</sub> O                                               | 0.21682    | -725.71567            | 0.14993               | -725.78256            | 1.5                   | 6.5                   |
| G4-IM3                                                                                                                    | 0.26464    | -765.34624            | 0.18993               | -765.42096            |                       |                       |
| G4-IM3 - [CH <sub>3</sub> OH <sub>2</sub> ] <sup>+</sup> + H <sub>2</sub> O                                               | 0.22219    | -725.72493            | 0.15629               | -725.79083            | -22.8                 | -15.2                 |
| G4-IM4                                                                                                                    | 0.21092    | -649.73938            | 0.14599               | -649.80432            |                       |                       |
| G4-IM4 + CH <sub>3</sub> OH - [CH <sub>3</sub> OH <sub>2</sub> ] <sup>+</sup> + H <sub>2</sub> O                          | 0.21985    | -725.70225            | 0.13090               | -725.79121            | 36.7                  | -16.2                 |
| G4-TS3                                                                                                                    | 0.20849    | -649.72226            | 0.14480               | -649.78595            |                       |                       |
| G4-TS3 + CH <sub>3</sub> OH - [CH <sub>3</sub> OH <sub>2</sub> ] <sup>+</sup> + H <sub>2</sub> O                          | 0.21742    | -725.68514            | 0.12971               | -725.77284            | 81.7                  | 32.0                  |
| G4-IM5                                                                                                                    | 0.20825    | -649.74293            | 0.13999               | -649.81120            |                       |                       |
| G4-IM5 + CH <sub>3</sub> OH - [CH <sub>3</sub> OH <sub>2</sub> ] <sup>+</sup> + H <sub>2</sub> O                          | 0.21718    | -725.70580            | 0.12490               | -725.79809            | 27.4                  | -34.3                 |
| G4-TS4                                                                                                                    | 0.20562    | -649.72635            | 0.13745               | -649.79453            |                       |                       |
| G4-TS4 + CH <sub>3</sub> OH - [CH <sub>3</sub> OH <sub>2</sub> ] <sup>+</sup> + H <sub>2</sub> O                          | 0.21455    | -725.68922            | 0.12236               | -725.78142            | 70.9                  | 9.5                   |
| G4-IM6                                                                                                                    | 0.20454    | -649.73578            | 0.12946               | -649.81086            |                       |                       |
| G4-IM6 + CH <sub>3</sub> OH - [CH <sub>3</sub> OH <sub>2</sub> ] <sup>+</sup> + H <sub>2</sub> O                          | 0.21347    | -725.69865            | 0.11437               | -725.79775            | 46.2                  | -33.4                 |
| G4-TS5                                                                                                                    | 0.20068    | -649.72403            | 0.12728               | -649.79743            |                       |                       |
| G4-TS5 + CH <sub>3</sub> OH - [CH <sub>3</sub> OH <sub>2</sub> ] <sup>+</sup> + H <sub>2</sub> O                          | 0.20961    | -725.68691            | 0.11219               | -725.78432            | 77.0                  | 1.9                   |
| G4-IM7                                                                                                                    | 0.14172    | -420.90499            | 0.08631               | -420.96039            |                       |                       |
| G4-IM7 + CH <sub>3</sub> OH - [CH <sub>3</sub> OH <sub>2</sub> ] <sup>+</sup> + H <sub>2</sub> O + HCOOCH <sub>3</sub>    | 0.21242    | -725.68700            | 0.09465               | -725.80476            | 76.8                  | -51.8                 |
| G4-TS6                                                                                                                    | 0.19430    | -536.49504            | 0.13098               | -536.55837            |                       |                       |
| G4-TS6 - [CH <sub>3</sub> OH <sub>2</sub> ] <sup>+</sup> + H <sub>2</sub> O + HCOOCH <sub>3</sub>                         | 0.21361    | -725.69287            | 0.12076               | -725.78571            | 61.4                  | -1.8                  |
| G4-IM8                                                                                                                    | 0.19819    | -536.51614            | 0.13442               | -536.57990            |                       |                       |
| G4-IM8 - [CH <sub>3</sub> OH <sub>2</sub> ] <sup>+</sup> + H <sub>2</sub> O + HCOOCH <sub>3</sub>                         | 0.21750    | -725.71396            | 0.12421               | -725.80725            | 6.0                   | -58.3                 |
| G4-TS7                                                                                                                    | 0.19435    | -536.51377            | 0.13199               | -536.57612            |                       |                       |
| G4-TS7 - [CH <sub>3</sub> OH <sub>2</sub> ] <sup>+</sup> + H <sub>2</sub> O + HCOOCH <sub>3</sub>                         | 0.21366    | -725.71159            | 0.12178               | -725.80347            | 12.2                  | -48.4                 |
| G4-IM9                                                                                                                    | 0.19787    | -536.51590            | 0.13316               | -536.58062            |                       |                       |
| G4-IM9 - [CH <sub>3</sub> OH <sub>2</sub> ] <sup>+</sup> + H <sub>2</sub> O + HCOOCH <sub>3</sub>                         | 0.21718    | -725.71372            | 0.12294               | -725.80796            | 6.6                   | -60.2                 |
| G4-TS8                                                                                                                    | 0.19083    | -536.49947            | 0.12203               | -536.56827            |                       |                       |
| G4-TS8 - [CH <sub>3</sub> OH <sub>2</sub> ] <sup>+</sup> + H <sub>2</sub> O + HCOOCH <sub>3</sub>                         | 0.21015    | -725.69729            | 0.11182               | -725.79561            | 49.7                  | -27.8                 |
| G4-IM10                                                                                                                   | 0.16728    | -460.13478            | 0.10671               | -460.19535            |                       |                       |
| G4-IM10 - [CH <sub>3</sub> OH <sub>2</sub> ] <sup>+</sup> + 2*H <sub>2</sub> O + HCOOCH <sub>3</sub>                      | 0.20793    | -725.69729            | 0.09322               | -725.81199            | 49.7                  | -70.8                 |
| G4-TS9                                                                                                                    | 0.16598    | -460.12303            | 0.10750               | -460.18151            |                       |                       |
| G4-TS9 - [CH <sub>3</sub> OH <sub>2</sub> ] <sup>+</sup> + 2*H <sub>2</sub> O + HCOOCH <sub>3</sub>                       | 0.20662    | -725.68554            | 0.09401               | -725.79815            | 80.6                  | -34.4                 |
| G4-IM11                                                                                                                   | 0.17037    | -460.18200            | 0.11142               | -460.24095            |                       |                       |
| G4-IM11 - [CH <sub>3</sub> OH <sub>2</sub> ] <sup>+</sup> + 2*H <sub>2</sub> O + HCOOCH <sub>3</sub>                      | 0.21101    | -725.74451            | 0.09793               | -725.85759            | -74.2                 | -190.5                |
| G4-IM12                                                                                                                   | 0.22341    | -575.78781            | 0.15314               | -575.85807            |                       |                       |
| G4-IM12 - [CH <sub>3</sub> OH <sub>2</sub> ] <sup>+</sup> + 2*H <sub>2</sub> O + HCOOCH <sub>3</sub> - CH <sub>3</sub> OH | 0.21267    | -725.76613            | 0.12110               | -725.85770            | -131.0                | -190.8                |

## Continued from Table S17

| Species                                                                                                 | ZPE     | $E_c$      | $G_0$   | $G_c$      | $E_r$  | $G_r$  |
|---------------------------------------------------------------------------------------------------------|---------|------------|---------|------------|--------|--------|
| G4-TS10                                                                                                 | 0.21895 | -575.74595 | 0.14884 | -575.81606 |        |        |
| G4-TS10 - $[\text{CH}_3\text{OH}_2]^+ + 2^*\text{H}_2\text{O} + \text{HCOOCH}_3 - \text{CH}_3\text{OH}$ | 0.20821 | -725.72428 | 0.11680 | -725.81569 | -21.1  | -80.5  |
| G4-IM13                                                                                                 | 0.16567 | -460.16565 | 0.10497 | -460.22635 |        |        |
| G4-IM13 - $[\text{CH}_3\text{OH}_2]^+ + 2^*\text{H}_2\text{O} + \text{HCOOCH}_3$                        | 0.20632 | -725.72816 | 0.09148 | -725.84300 | -31.3  | -152.2 |
| G4-TS11                                                                                                 | 0.19064 | -536.52436 | 0.12506 | -536.58994 |        |        |
| G4-TS11 - $[\text{CH}_3\text{OH}_2]^+ + \text{H}_2\text{O} + \text{HCOOCH}_3$                           | 0.20996 | -725.72218 | 0.11485 | -725.81729 | -15.6  | -84.7  |
| G4-IM14                                                                                                 | 0.19943 | -536.56670 | 0.13619 | -536.62995 |        |        |
| G4-IM14 - $[\text{CH}_3\text{OH}_2]^+ + \text{H}_2\text{O} + \text{HCOOCH}_3$                           | 0.21874 | -725.76453 | 0.12598 | -725.85729 | -126.8 | -189.7 |
| G4-TS12                                                                                                 | 0.19553 | -536.56655 | 0.13326 | -536.62882 |        |        |
| G4-TS12 - $[\text{CH}_3\text{OH}_2]^+ + \text{H}_2\text{O} + \text{HCOOCH}_3$                           | 0.21484 | -725.76437 | 0.12304 | -725.85617 | -126.4 | -186.8 |
| G4-IM15                                                                                                 | 0.19921 | -536.56645 | 0.13592 | -536.62975 |        |        |
| G4-IM15 - $[\text{CH}_3\text{OH}_2]^+ + \text{H}_2\text{O} + \text{HCOOCH}_3$                           | 0.21853 | -725.76428 | 0.12570 | -725.85710 | -126.1 | -189.2 |
| G4-TS13                                                                                                 | 0.19101 | -536.51467 | 0.12682 | -536.57886 |        |        |
| G4-TS13 - $[\text{CH}_3\text{OH}_2]^+ + \text{H}_2\text{O} + \text{HCOOCH}_3$                           | 0.21032 | -725.71249 | 0.11661 | -725.80620 | 9.8    | -55.6  |
| H-IM14                                                                                                  | 0.16876 | -460.22374 | 0.10849 | -460.28401 |        |        |
| H-IM14 - $[\text{CH}_3\text{OH}_2]^+ + 2^*\text{H}_2\text{O} + \text{HCOOCH}_3$                         | 0.20940 | -725.78625 | 0.09500 | -725.90065 | -183.8 | -303.6 |
| MLev                                                                                                    | 0.15586 | -459.81561 | 0.09582 | -459.87564 |        |        |
| MLev + $2^*\text{H}_2\text{O} - \text{CH}_3\text{OH} + \text{HCOOCH}_3$                                 | 0.20890 | -725.77993 | 0.09414 | -725.89469 | -167.2 | -287.9 |

**Table S18.** Zero-point energies (*ZPE*, hartree), thermal correction to Gibbs free energy (*G*<sub>0</sub>, hartree), total energies (*E*<sub>c</sub>, hartree) corrected by *ZPE*, Sum of electronic and thermal free energies (*G*<sub>c</sub>, hartree) with *ZPE* and thermal corrections, and relative energies (*E*<sub>r</sub>, kJ mol<sup>-1</sup>) and relative Gibbs free energies (*G*<sub>r</sub>, kJ mol<sup>-1</sup>) for the conversion of HMF through protonation of the carbonyl oxygen with CH<sub>3</sub>OH to both MLev and MF catalyzed by [CH<sub>3</sub>OH<sub>2</sub>]<sup>+</sup> in methanol solution.

| Species                                                                                               | <i>ZPE</i> | <i>E</i> <sub>c</sub> | <i>G</i> <sub>0</sub> | <i>G</i> <sub>c</sub> | <i>E</i> <sub>r</sub> | <i>G</i> <sub>r</sub> |
|-------------------------------------------------------------------------------------------------------|------------|-----------------------|-----------------------|-----------------------|-----------------------|-----------------------|
| CH <sub>3</sub> OH                                                                                    | 0.05138    | -115.58419            | 0.01855               | -115.61702            |                       |                       |
| [CH <sub>3</sub> OH <sub>2</sub> ] <sup>+</sup>                                                       | 0.06379    | -115.98600            | 0.03036               | -116.01943            |                       |                       |
| H <sub>2</sub> O                                                                                      | 0.02133    | -76.36469             | -0.00328              | -76.38930             |                       |                       |
| HCOOCH <sub>3</sub>                                                                                   | 0.06177    | -228.81914            | 0.02343               | -228.85748            |                       |                       |
| <i>β</i> -D-fructofuranoses                                                                           | 0.19778    | -686.49060            | 0.13320               | -686.55518            | 0.0                   | 0.0                   |
| HMF-1                                                                                                 | 0.11257    | -457.40525            | 0.05813               | -457.45969            |                       |                       |
| HMF-1 + 3*H <sub>2</sub> O                                                                            | 0.17657    | -686.49931            | 0.04829               | -686.62759            | -22.9                 | -190.1                |
| H-1-IM1                                                                                               | 0.12537    | -457.81959            | 0.06996               | -457.87500            |                       |                       |
| H-1-IM1 + 3*H <sub>2</sub> O - [CH <sub>3</sub> OH <sub>2</sub> ] <sup>+</sup> + CH <sub>3</sub> OH   | 0.17696    | -686.51183            | 0.04831               | -686.64049            | -55.7                 | -224.0                |
| H-2-TS1                                                                                               | 0.23193    | -688.92643            | 0.15751               | -689.00085            |                       |                       |
| H-2-TS1 + 3*H <sub>2</sub> O - [CH <sub>3</sub> OH <sub>2</sub> ] <sup>+</sup> - CH <sub>3</sub> OH   | 0.18076    | -686.45030            | 0.09876               | -686.53229            | 105.8                 | 60.1                  |
| H-1-TS1                                                                                               | 0.23350    | -688.98874            | 0.15826               | -689.06398            |                       |                       |
| H-1-TS1 + 3*H <sub>2</sub> O - [CH <sub>3</sub> OH <sub>2</sub> ] <sup>+</sup> - CH <sub>3</sub> OH   | 0.18232    | -686.51261            | 0.09951               | -686.59543            | -57.8                 | -105.7                |
| H-1-IM2                                                                                               | 0.23506    | -688.99690            | 0.16033               | -689.07163            |                       |                       |
| H-1-IM2 + 3*H <sub>2</sub> O - [CH <sub>3</sub> OH <sub>2</sub> ] <sup>+</sup> - CH <sub>3</sub> OH   | 0.18389    | -686.52078            | 0.10158               | -686.60308            | -79.2                 | -125.8                |
| H-1-IM3                                                                                               | 0.23556    | -688.99825            | 0.16092               | -689.07289            |                       |                       |
| H-1-IM3 + 3*H <sub>2</sub> O - [CH <sub>3</sub> OH <sub>2</sub> ] <sup>+</sup> - CH <sub>3</sub> OH   | 0.18438    | -686.52212            | 0.10217               | -686.60434            | -82.8                 | -129.1                |
| H-1-TS2                                                                                               | 0.23189    | -689.00286            | 0.16022               | -689.06453            |                       |                       |
| H-1-TS2 + 3*H <sub>2</sub> O - [CH <sub>3</sub> OH <sub>2</sub> ] <sup>+</sup> - CH <sub>3</sub> OH   | 0.18071    | -686.52673            | 0.10147               | -686.59598            | -94.9                 | -107.1                |
| H-1-IM4                                                                                               | 0.23524    | -689.01192            | 0.15799               | -689.06877            |                       |                       |
| H-1-IM4 + 3*H <sub>2</sub> O - [CH <sub>3</sub> OH <sub>2</sub> ] <sup>+</sup> - CH <sub>3</sub> OH   | 0.18406    | -686.53580            | 0.09924               | -686.60022            | -118.7                | -118.3                |
| H-1-TS3                                                                                               | 0.23025    | -688.97854            | 0.15443               | -689.05435            |                       |                       |
| H-1-TS3 + 3*H <sub>2</sub> O - [CH <sub>3</sub> OH <sub>2</sub> ] <sup>+</sup> - CH <sub>3</sub> OH   | 0.17907    | -686.50241            | 0.09568               | -686.58580            | -31.0                 | -80.4                 |
| H-1-IM5                                                                                               | 0.23022    | -688.98270            | 0.14717               | -689.06575            |                       |                       |
| H-1-IM5 + 3*H <sub>2</sub> O - [CH <sub>3</sub> OH <sub>2</sub> ] <sup>+</sup> - CH <sub>3</sub> OH   | 0.17905    | -686.50657            | 0.08843               | -686.59719            | -41.9                 | -110.3                |
| H-1-IM6                                                                                               | 0.25988    | -728.20289            | 0.17586               | -728.28691            |                       |                       |
| H-1-IM6 + 4*H <sub>2</sub> O - [CH <sub>3</sub> OH <sub>2</sub> ] <sup>+</sup> - 2*CH <sub>3</sub> OH | 0.17865    | -686.50726            | 0.09528               | -686.59064            | -43.7                 | -93.1                 |
| H-1-TS4                                                                                               | 0.25986    | -728.19798            | 0.18205               | -728.27579            |                       |                       |
| H-1-TS4 + 4*H <sub>2</sub> O - [CH <sub>3</sub> OH <sub>2</sub> ] <sup>+</sup> - 2*CH <sub>3</sub> OH | 0.17863    | -686.50235            | 0.10147               | -686.57952            | -30.9                 | -63.9                 |
| H-1-IM7                                                                                               | 0.26220    | -728.21700            | 0.18546               | -728.29373            |                       |                       |
| H-1-IM7 + 4*H <sub>2</sub> O - [CH <sub>3</sub> OH <sub>2</sub> ] <sup>+</sup> - 2*CH <sub>3</sub> OH | 0.18097    | -686.52137            | 0.10488               | -686.59746            | -80.8                 | -111.0                |
